# Supplementary material
Source: ML conference proceedings conference paper supplement (https://proceedings.mlr.press/v84/cavazza18a.html)
Supplement: Supplementary file 1 [file cavazza18a-supp.pdf]

---

# Supplementary Material to Dropout as a Low-Rank Regularizer for Matrix Factorization

---

Jacopo Cavazza<sup>1</sup>, Pietro Morerio<sup>1</sup>, Benjamin D. Haeffele<sup>2</sup>, Connor Lane<sup>2</sup>, Vittorio Murino<sup>1</sup>, René Vidal<sup>2</sup>

<sup>1</sup> Pattern Analysis and Computer Vision, Istituto Italiano di Tecnologia, Genova, 16163, Italy

<sup>2</sup> Johns Hopkins University, Center for Imaging Science, Baltimore, MD 21218, USA

`jacopo.cavazza@iit.it, pietro.morerio@iit.it, bhaeffele@jhu.edu,`  
`connor.lane@jhu.edu, vittorio.murino@iit.it, rvidal@cis.jhu.edu`

## Contents

|                                                                                         |    |
|-----------------------------------------------------------------------------------------|----|
| 1 Proof of the equality between the dropout and its deterministic reformulation         | 2  |
| 2 Matrix factorization with variable size                                               | 5  |
| 3 Variational form of the nuclear norm                                                  | 9  |
| 4 (Lower) convex envelope of the regularizer                                            | 14 |
| 5 Optimal dropout for MF satisfies the optimality conditions for the convex lower bound | 16 |
| 6 Closed-form solution for the convex lower bound of dropout for MF                     | 23 |
| 7 Complementary results for the numerical simulation                                    | 25 |

## 1 Proof of the equality between the dropout and its deterministic reformulation

**Proposition 1.** For a fixed  $m \times n$  matrix  $\mathbf{X}$ , consider the problem of factorizing  $\mathbf{X}$  into the product  $\mathbf{U}\mathbf{V}^\top$  where  $\mathbf{U}$  is  $m \times d$  and  $\mathbf{V}$  is  $n \times d$ , for some  $d \geq \rho(\mathbf{X}) := \text{rank}(\mathbf{X})$ . Define  $\mathbf{r} = [r_1, \dots, r_d]$ , whose elements are Bernoulli( $\theta$ ) i.i.d. where  $0 < \theta < 1$ . Furthermore, denote  $\mathbf{u}_k \in \mathbb{R}^m$  and  $\mathbf{v}_k \in \mathbb{R}^n$  the  $k$ -th column in  $\mathbf{U}$  and  $\mathbf{V}$ , respectively,  $k = 1, \dots, d$ . Then,

$$\mathbb{E}_{\mathbf{r}} \left\| \mathbf{X} - \frac{1}{\theta} \mathbf{U} \text{diag}(\mathbf{r}) \mathbf{V}^\top \right\|_F^2 = \|\mathbf{X} - \mathbf{U}\mathbf{V}^\top\|_F^2 + \frac{1-\theta}{\theta} \sum_{k=1}^d \|\mathbf{u}_k\|_2^2 \|\mathbf{v}_k\|_2^2. \quad (1)$$

*Proof.* Equivalently, we will demonstrate that

$$\mathbb{E}_{\mathbf{r}} \|\theta \mathbf{X} - \mathbf{U} \text{diag}(\mathbf{r}) \mathbf{V}^\top\|_F^2 = \theta^2 \|\mathbf{X} - \mathbf{U}\mathbf{V}^\top\|_F^2 + \theta(1-\theta) \sum_{k=1}^d \|\mathbf{u}_k\|_2^2 \|\mathbf{v}_k\|_2^2.$$

Since

$$\begin{aligned} & \mathbb{E}_{\mathbf{r}} \|\theta \mathbf{X} - \mathbf{U} \text{diag}(\mathbf{r}) \mathbf{V}^\top\|_F^2 = \\ & = \mathbb{E}_{\mathbf{r}} \left\| \begin{bmatrix} \theta X_{11} - \sum_{k=1}^d U_{1k} r_k V_{1k}, & \dots, & \theta X_{1n} - \sum_{k=1}^d U_{1k} r_k V_{nk} \\ \vdots & \ddots & \vdots \\ \theta X_{m1} - \sum_{k=1}^d U_{mk} r_k V_{1k}, & \dots, & \theta X_{mn} - \sum_{k=1}^d U_{mk} r_k V_{nk} \end{bmatrix} \right\|_F^2, \end{aligned} \quad (2)$$

by definition of Frobenius norm and linearity of  $\mathbb{E}_{\mathbf{r}}$ , we elicit

$$\mathbb{E}_{\mathbf{r}} \|\theta \mathbf{X} - \mathbf{U} \text{diag}(\mathbf{r}) \mathbf{V}^\top\|_F^2 = \sum_{i=1}^m \sum_{j=1}^n \mathbb{E}_{\mathbf{r}} \left[ \left( \theta X_{ij} - \sum_{k=1}^d U_{ik} r_k V_{jk} \right)^2 \right]. \quad (3)$$

Use the bias-variance decomposition  $\mathbb{E}[r^2] = \mathbb{V}[r] + \mathbb{E}[r]^2$ , holding for a scalar random variable  $r$ .

$$\begin{aligned} \mathbb{E}_{\mathbf{r}} \|\theta \mathbf{X} - \mathbf{U} \text{diag}(\mathbf{r}) \mathbf{V}^\top\|_F^2 &= \sum_{i=1}^m \sum_{j=1}^n \mathbb{V}_{\mathbf{r}} \left[ \theta X_{ij} - \sum_{k=1}^d U_{ik} r_k V_{jk} \right] + \\ &+ \sum_{i=1}^m \sum_{j=1}^n \left( \mathbb{E}_{\mathbf{r}} \left[ \theta X_{ij} - \sum_{k=1}^d U_{ik} r_k V_{jk} \right] \right)^2. \end{aligned} \quad (4)$$

Since  $r_1, \dots, r_d$  are i.i.d., use the properties of expectation  $\mathbb{E}_{\mathbf{r}}$  and variance  $\mathbb{V}_{\mathbf{r}}$  with respect to linear combinations of independent random variables.

$$\begin{aligned} \mathbb{E}_{\mathbf{r}} \|\theta \mathbf{X} - \mathbf{U} \text{diag}(\mathbf{r}) \mathbf{V}^\top\|_F^2 &= \sum_{i=1}^m \sum_{j=1}^n \sum_{k=1}^d U_{ik}^2 V_{jk}^2 \mathbb{V}_{\mathbf{r}}[r_k] + \\ &+ \sum_{i=1}^m \sum_{j=1}^n \left( \theta X_{ij} - \sum_{k=1}^d U_{ik} \mathbb{E}_{\mathbf{r}}[r_k] V_{jk} \right)^2. \end{aligned} \quad (5)$$

Exploit the analytical formulas for expected value and variance of a Bernoulli( $\theta$ ) distribution.

$$\begin{aligned} \mathbb{E}_{\mathbf{r}} \|\theta \mathbf{X} - \mathbf{U} \text{diag}(\mathbf{r}) \mathbf{V}^\top\|_F^2 &= \sum_{i=1}^m \sum_{j=1}^n \sum_{k=1}^d U_{ik}^2 V_{jk}^2 \cdot \theta(1-\theta) + \\ &+ \sum_{i=1}^m \sum_{j=1}^n \left( \theta X_{ij} - \sum_{k=1}^d U_{ik} \cdot \theta \cdot V_{jk} \right)^2. \end{aligned} \quad (6)$$

Rearrange the terms.

$$\begin{aligned} \mathbb{E}_{\mathbf{r}} \|\theta \mathbf{X} - \mathbf{U} \text{diag}(\mathbf{r}) \mathbf{V}^\top\|_F^2 &= \theta(1 - \theta) \sum_{k=1}^d \left( \sum_{i=1}^m U_{ik}^2 \right) \left( \sum_{j=1}^n V_{jk}^2 \right) + \\ &+ \theta^2 \sum_{i=1}^m \sum_{j=1}^n \left( X_{ij} - \sum_{k=1}^d U_{ik} V_{jk} \right)^2. \end{aligned} \quad (7)$$

Use the definition of row-by-column product of matrices

$$\begin{aligned} \mathbb{E}_{\mathbf{r}} \|\theta \mathbf{X} - \mathbf{U} \text{diag}(\mathbf{r}) \mathbf{V}^\top\|_F^2 &= \theta(1 - \theta) \sum_{k=1}^d \left( \sum_{i=1}^m U_{ik}^2 \right) \left( \sum_{j=1}^n V_{jk}^2 \right) + \\ &+ \theta^2 \sum_{i=1}^m \sum_{j=1}^n \left( X_{ij} - [\mathbf{U} \mathbf{V}^\top]_{ij} \right)^2. \end{aligned} \quad (8)$$

Apply the definitions of squared Euclidean norm  $\|\cdot\|_2^2$  and Frobenius norm  $\|\cdot\|_F$

$$\mathbb{E}_{\mathbf{r}} \|\theta \mathbf{X} - \mathbf{U} \text{diag}(\mathbf{r}) \mathbf{V}^\top\|_F^2 = \theta(1 - \theta) \sum_{k=1}^d \|\mathbf{u}_k\|_2^2 \|\mathbf{v}_k\|_2^2 + \theta^2 \|\mathbf{X} - \mathbf{U} \mathbf{V}^\top\|_F^2.$$

This concludes the proof. □

**Proposition 2.**

$$0 = \inf_{d, \mathbf{U}, \mathbf{V}} \sum_{k=1}^d \|\mathbf{u}_k\|_2^2 \|\mathbf{v}_k\|_2^2 \quad s.t. \quad d \geq \rho(\mathbf{X}), \mathbf{U} \in \mathbb{R}^{m \times d}, \mathbf{V} \in \mathbb{R}^{n \times d} \text{ and } \mathbf{U}\mathbf{V}^\top = \mathbf{X}. \quad (9)$$

*Proof.* Let  $\mathbf{U}$  and  $\mathbf{V}$  such that  $\mathbf{U}\mathbf{V}^\top = \mathbf{X}$  for a particular choice of  $d$ . Denote

$$\Omega(\mathbf{U}, \mathbf{V}) = \sum_{k=1}^d \|\mathbf{u}_k\|_2^2 \|\mathbf{v}_k\|_2^2 \quad (10)$$

and define

$$\mathbf{A} = \frac{\sqrt{2}}{2} [\mathbf{U}, \mathbf{U}] \in \mathbb{R}^{m \times 2d} \quad (11)$$

$$\mathbf{B} = \frac{\sqrt{2}}{2} [\mathbf{V}, \mathbf{V}] \in \mathbb{R}^{n \times 2d}. \quad (12)$$

Then

$$\mathbf{A}\mathbf{B}^\top = \left(\frac{\sqrt{2}}{2}\right)^2 \mathbf{U}\mathbf{V}^\top + \left(\frac{\sqrt{2}}{2}\right)^2 \mathbf{U}\mathbf{V}^\top = \frac{1}{2}\mathbf{X} + \frac{1}{2}\mathbf{X} = \mathbf{X} \quad (13)$$

and

$$\Omega(\mathbf{A}, \mathbf{B}) = \sum_{k=1}^{2d} \|\mathbf{a}_k\|_2^2 \|\mathbf{b}_k\|_2^2 \quad (14)$$

$$= \frac{1}{4} \sum_{k=1}^d \|\mathbf{u}_k\|_2^2 \|\mathbf{v}_k\|_2^2 + \frac{1}{4} \sum_{k=1}^d \|\mathbf{u}_k\|_2^2 \|\mathbf{v}_k\|_2^2 = \frac{1}{2} \Omega(\mathbf{U}, \mathbf{V}). \quad (15)$$

In light of this observation, suppose, by absurd that  $\varepsilon > 0$  is the minimum of (9), being such value realizes for some matrix  $\mathbf{U}$  and  $\mathbf{V}$ . Then, we can repeat the same construction and produce a pairs of matrix  $\mathbf{A}$  and  $\mathbf{B}$  such that  $\Omega(\mathbf{A}, \mathbf{B}) = \frac{\varepsilon}{2}$ . Thus, necessarily, (9) holds being the objective non-negative.  $\square$

## 2 Matrix factorization with variable size

**Proposition 3.** For every  $0 < p < 1$ , define

$$\theta(d) = \frac{p}{d - (d-1)p}. \quad (16)$$

Then, the following properties hold.

1.  $0 < \theta(d) < 1$  for all  $d \in \mathbb{N} \setminus \{0\}$ .
2.  $\frac{1 - \theta(kd)}{\theta(kd)} = k \frac{1 - \theta(d)}{\theta(d)}$  for all  $k \in \mathbb{N} \setminus \{0\}$ .

*Proof.* 1. We will prove  $\theta(d) > 0$  and  $\theta(d) < 1$  separately. Since  $p > 0$ , then  $\theta(d) > 0$  if and only if  $m - (m-1)p > 0$ .

But this is true since

$$m - (m-1)p = m - mp + p \geq m(1-p) > 0. \quad (17)$$

On the other hand, since the fraction  $\theta(d)$  is positive,  $\theta(d) < 1$  is verified if and only if

$$p < m - (m-1)p \quad (18)$$

if and only if

$$0 < m - mp \quad (19)$$

if and only if

$$p < 1 \quad (20)$$

which is actually true by assumption.

2. The property can also be verified analytically by noticing that

$$\frac{1 - \theta(d)}{\theta(d)} = \frac{1 - \frac{p}{d - (d-1)p}}{\frac{p}{d - (d-1)p}} = \frac{d - (d-1)p - p}{p} = d \frac{1-p}{p}. \quad (21)$$

This concludes the proof

□

**Proposition 4.** For any  $m \times n$  matrix  $\mathbf{X}$ , consider the expression

$$\|\mathbf{X}\|_{\Delta} = \min_{d, \mathbf{U}, \mathbf{V}} \sqrt{\lambda_d \sum_{k=1}^d \|\mathbf{u}_k\|_2^2 \|\mathbf{v}_k\|_2^2} \quad \text{s.t.} \quad d \geq \rho(\mathbf{X}), \mathbf{U} \in \mathbb{R}^{m \times d}, \mathbf{V} \in \mathbb{R}^{n \times d} \text{ and } \mathbf{U}\mathbf{V}^{\top} = \mathbf{X}. \quad (22)$$

where  $\lambda_d = d^{\frac{1-p}{p}}$ , for any  $0 < p < 1$ ,  $\mathbf{u}_k \in \mathbb{R}^m$  and  $\mathbf{v}_k \in \mathbb{R}^n$  define the  $k$ -th column in  $\mathbf{U}$  and  $\mathbf{V}$ , respectively,  $k = 1, \dots, d$ . Then, equation (22) defines a quasi-norm over  $m \times n$  matrices.

*Proof.* Using the definition of quasi-norm, we have to prove the following

- $\|\mathbf{X}\|_{\Delta} \geq 0$  for every  $\mathbf{X} \in \mathbb{R}^{m \times n}$
- $\|\mathbf{X}\|_{\Delta} = 0 \iff \mathbf{X} = \mathbf{0}$
- $\|\alpha \mathbf{X}\|_{\Delta} = |\alpha| \|\mathbf{X}\|_{\Delta}$  for every  $\alpha \in \mathbb{R}$  and  $\mathbf{X} \in \mathbb{R}^{m \times n}$
- $\|\cdot\|_{\Delta}$  is unitarily invariant. In formulæ

$$\|\mathbf{P}\mathbf{X}\mathbf{Q}\|_{\Delta} = \|\mathbf{X}\|_{\Delta} \quad \text{for every } \mathbf{P} \in O_m \text{ and } \mathbf{Q} \in O_n, \quad (23)$$

where  $O_p := \{\mathbf{A} \in \mathbb{R}^{p \times p} : \mathbf{A}^{\top} \mathbf{A} = \mathbf{A}\mathbf{A}^{\top} = \mathbf{I}\}$  is the set of all orthonormal matrices of size  $p$ .

- Fix  $\mathbf{X} \in \mathbb{R}^{m \times n}$  and arbitrary choose a pair of matrices  $\mathbf{U}$  and  $\mathbf{V}$ , of suitable dimensions, such that  $\mathbf{U}\mathbf{V}^{\top} = \mathbf{X}$ . We get

$$\sqrt{\lambda_d \sum_{k=1}^d \|\mathbf{u}_k\|_2^2 \|\mathbf{v}_k\|_2^2} \geq 0.$$

Since the very same holds when computing the minimum over  $d, \mathbf{U}$  and  $\mathbf{V}$ , we obtain  $\|\mathbf{X}\|_{\Delta} \geq 0$ .

- “ $\|\mathbf{X}\|_{\Delta} = 0 \Rightarrow \mathbf{X} = \mathbf{0}$ ” Let  $\bar{\mathbf{U}} \in \mathbb{R}^{m \times \bar{d}}$  and  $\bar{\mathbf{V}} \in \mathbb{R}^{n \times \bar{d}}$  such that

$$\|\mathbf{X}\|_{\Delta} = \sqrt{\lambda_{\bar{d}} \sum_{k=1}^{\bar{d}} \|\bar{\mathbf{u}}_k\|_2^2 \|\bar{\mathbf{v}}_k\|_2^2}$$

and assume

$$\sqrt{\lambda_{\bar{d}} \sum_{k=1}^{\bar{d}} \|\bar{\mathbf{u}}_k\|_2^2 \|\bar{\mathbf{v}}_k\|_2^2} = 0.$$

Then

$$\sum_{k=1}^{\bar{d}} \|\bar{\mathbf{u}}_k\|_2^2 \|\bar{\mathbf{v}}_k\|_2^2 = 0$$

since  $\lambda_d > 0$  (due to  $0 < \theta(d) < 1$ ) and, also,

$$\|\bar{\mathbf{u}}_k\|_2^2 \|\bar{\mathbf{v}}_k\|_2^2 = 0 \quad \text{for every } k = 1, \dots, \bar{d}, \quad (24)$$

since the summation is composed by non-negative terms. By using the zero-product property, we elicit

$$\text{for every } k = 1, \dots, \bar{d} \quad \|\bar{\mathbf{u}}_k\|_2^2 = 0 \text{ or } \|\bar{\mathbf{v}}_k\|_2^2 = 0 \quad (25)$$

and

$$\text{for every } k = 1, \dots, \bar{d} \quad \|\bar{\mathbf{u}}_k\|_2 = 0 \text{ or } \|\bar{\mathbf{v}}_k\|_2 = 0. \quad (26)$$

This implies that

$$\text{for every } k = 1, \dots, \bar{d} \quad \bar{\mathbf{u}}_k = \mathbf{0} \text{ or } \bar{\mathbf{v}}_k = \mathbf{0} \quad (27)$$

since  $\|\cdot\|_2$  is a norm. But then, for any  $i = 1, \dots, m$  and  $j = 1, \dots, n$ , the combination of the relationship

$$X_{ij} = \sum_{k=1}^d \bar{U}_{ik} \bar{V}_{jk} \quad (28)$$

combined with (27) gives

$$X_{ij} = 0 \quad \text{for every } i, j \quad (29)$$

which is the first half of the thesis. The second one, “ $\|\mathbf{X}\|_{\Delta} = 0 \Leftrightarrow \mathbf{X} = \mathbf{0}$ ”, follows from the following arguments. Assume  $\mathbf{X} = \mathbf{0}$ . Then the optimal decomposition  $\mathbf{U}\mathbf{V}^{\top} = \mathbf{X}$  in the sense of (22) will be  $\mathbf{U} = \mathbf{0}$  and  $\mathbf{V} = \mathbf{0}$ . This implies  $\|\mathbf{X}\|_{\Delta} = 0$ .

- (*Absolute homogeneity.*) Since we already proved (141), we can skip the case  $\alpha = 0$  because

$$\|0\mathbf{X}\|_{\Delta} = \|0\|_{\Delta} \stackrel{(141)}{=} 0 = 0 \cdot \|\mathbf{X}\|_{\Delta}. \quad (30)$$

Hence, let assume  $\alpha \neq 0$ . In such a case, by definition,

$$\|\alpha\mathbf{X}\|_{\Delta} = \underset{\substack{d \geq \rho(\alpha\mathbf{X}) \\ \mathbf{U} \in \mathbb{R}^{m \times d} \\ \mathbf{V} \in \mathbb{R}^{n \times d} \\ \text{s.t. } \mathbf{U}\mathbf{V}^{\top} = \alpha\mathbf{X}}}{\text{minimum}} \sqrt{\lambda_d \sum_{k=1}^d \|\mathbf{u}_k\|_2^2 \|\mathbf{v}_k\|_2^2}. \quad (31)$$

Since  $\alpha \neq 0$ ,

$$\|\alpha\mathbf{X}\|_{\Delta} = \underset{\substack{d \geq \rho(\mathbf{X}) \\ \mathbf{U} \in \mathbb{R}^{m \times d} \\ \mathbf{V} \in \mathbb{R}^{n \times d} \\ \text{s.t. } \mathbf{U}\mathbf{V}^{\top} = \alpha\mathbf{X}}}{\text{minimum}} \sqrt{\lambda_d \sum_{k=1}^d \|\mathbf{u}_k\|_2^2 \|\mathbf{v}_k\|_2^2}. \quad (32)$$

Equivalently,

$$\|\alpha\mathbf{X}\|_{\Delta} = |\alpha| \underset{\substack{d \geq \rho(\mathbf{X}) \\ \mathbf{U} \in \mathbb{R}^{m \times d} \\ \mathbf{V} \in \mathbb{R}^{n \times d} \\ \text{s.t. } (\frac{1}{\alpha}\mathbf{U})\mathbf{V}^{\top} = \mathbf{X}}}{\text{minimum}} \sqrt{\lambda_d \sum_{k=1}^d \left\| \frac{1}{\alpha} \mathbf{u}_k \right\|_2^2 \|\mathbf{v}_k\|_2^2}. \quad (33)$$

Since the transformation  $\mathbf{U} \mapsto \tilde{\mathbf{U}} := \frac{1}{\alpha}\mathbf{U}$  is invertible, we get

$$\|\alpha\mathbf{X}\|_{\Delta} = |\alpha| \underset{\substack{d \geq \rho(\mathbf{X}) \\ \tilde{\mathbf{U}} \in \mathbb{R}^{m \times d} \\ \mathbf{V} \in \mathbb{R}^{n \times d} \\ \text{s.t. } \tilde{\mathbf{U}}\mathbf{V}^{\top} = \mathbf{X}}}{\text{minimum}} \sqrt{\lambda_d \sum_{k=1}^d \|\tilde{\mathbf{u}}_k\|_2^2 \|\mathbf{v}_k\|_2^2} = |\alpha| \|\mathbf{X}\|_{\Delta}. \quad (34)$$

- Fix  $\mathbf{X} \in \mathbb{R}^{m \times n}$ ,  $\mathbf{P} \in O_m$  and  $\mathbf{Q} \in O_n$  arbitrary chosen. Then, by definition,

$$\|\mathbf{P}\mathbf{X}\mathbf{Q}\|_{\Delta} = \underset{\substack{d \geq \rho(\mathbf{P}\mathbf{X}\mathbf{Q}) \\ \mathbf{U} \in \mathbb{R}^{m \times d} \\ \mathbf{V} \in \mathbb{R}^{n \times d} \\ \text{s.t. } \mathbf{U}\mathbf{V}^{\top} = \mathbf{P}\mathbf{X}\mathbf{Q}}}{\text{minimum}} \sqrt{\lambda_d \sum_{k=1}^d \|\mathbf{u}_k\|_2^2 \|\mathbf{v}_k\|_2^2}. \quad (35)$$

Since  $\mathbf{P}$  and  $\mathbf{Q}$  are invertible,  $\rho(\mathbf{P}\mathbf{X}\mathbf{Q}) = \rho(\mathbf{X})$  and the equation  $\mathbf{U}\mathbf{V}^\top = \mathbf{P}\mathbf{X}\mathbf{Q}$  is equivalent to  $\mathbf{P}^\top\mathbf{U}\mathbf{V}^\top\mathbf{Q}^\top = \mathbf{X}$ . Therefore,

$$\|\mathbf{P}\mathbf{X}\mathbf{Q}\|_\Delta = \begin{array}{l} \text{minimum} \\ d \geq \rho(\mathbf{X}) \\ \mathbf{U} \in \mathbb{R}^{m \times d} \\ \mathbf{V} \in \mathbb{R}^{n \times d} \\ \text{s.t. } (\mathbf{P}^\top\mathbf{U})(\mathbf{Q}\mathbf{V})^\top = \mathbf{X} \end{array} \sqrt{\lambda_d \sum_{k=1}^d \|\mathbf{u}_k\|_2^2 \|\mathbf{v}_k\|_2^2}. \quad (36)$$

Define  $\tilde{\mathbf{U}} = \mathbf{P}^\top\mathbf{U}$  and  $\tilde{\mathbf{V}} = \mathbf{Q}\mathbf{V}$ . Since the maps  $\mathbf{U} \mapsto \tilde{\mathbf{U}}$  and  $\mathbf{V} \mapsto \tilde{\mathbf{V}}$ , we obtain

$$\|\mathbf{P}\mathbf{X}\mathbf{Q}\|_\Delta = \begin{array}{l} \text{minimum} \\ d \geq \rho(\mathbf{X}) \\ \tilde{\mathbf{U}} \in \mathbb{R}^{m \times d} \\ \tilde{\mathbf{V}} \in \mathbb{R}^{n \times d} \\ \text{s.t. } \tilde{\mathbf{U}}\tilde{\mathbf{V}}^\top = \mathbf{X} \end{array} \sqrt{\lambda_d \sum_{k=1}^d \|\mathbf{u}_k\|_2^2 \|\mathbf{v}_k\|_2^2} \quad (37)$$

and also

$$\|\mathbf{P}\mathbf{X}\mathbf{Q}\|_\Delta = \begin{array}{l} \text{minimum} \\ d \geq \rho(\mathbf{X}) \\ \tilde{\mathbf{U}} \in \mathbb{R}^{m \times d} \\ \tilde{\mathbf{V}} \in \mathbb{R}^{n \times d} \\ \text{s.t. } \tilde{\mathbf{U}}\tilde{\mathbf{V}}^\top = \mathbf{X} \end{array} \sqrt{\lambda_d \sum_{k=1}^d \|\tilde{\mathbf{u}}_k\|_2^2 \|\tilde{\mathbf{v}}_k\|_2^2} = \|\mathbf{X}\|_\Delta \quad (38)$$

since the Euclidean norm is unitarily invariant and therefore  $\|\tilde{\mathbf{u}}_k\|_2^2 = \|\mathbf{P}\mathbf{u}_k\|_2^2 = \|\mathbf{u}_k\|_2^2$  and  $\|\tilde{\mathbf{v}}_k\|_2^2 = \|\mathbf{Q}\mathbf{v}_k\|_2^2 = \|\mathbf{v}_k\|_2^2$ .  $\square$



### 3 Variational form of the nuclear norm

Let us introduce the following technical result.

**Lemma 1** (The Frobenius norm of a matrix is rotational invariant). *For any arbitrary  $m \times n$  matrix  $\mathbf{Y}$  and for any  $\mathbf{R}_1 \in O(m)$  and  $\mathbf{R}_2 \in O(n)$ , we have*

$$\|\mathbf{Y}\|_F = \|\mathbf{R}_1 \mathbf{Y} \mathbf{R}_2\|_F. \quad (39)$$

*Proof.* Fix  $\mathbf{Y} \in \mathbb{R}^{m \times n}$ ,  $\mathbf{R}_1 \in O(m)$  and  $\mathbf{R}_2 \in O(n)$  arbitrary chosen. By observing that, for a rotational matrix, inverse and adjoint are equal, we get

$$\begin{aligned} \|\mathbf{Y}\|_F^2 &= \langle \mathbf{Y}, \mathbf{Y} \rangle_F \\ &= \langle \mathbf{R}_1^\top \mathbf{R}_1 \mathbf{Y}, \mathbf{Y} \rangle_F \\ &= \langle \mathbf{R}_1^\top \mathbf{R}_1 \mathbf{Y}, \mathbf{Y} \mathbf{R}_2^\top \mathbf{R}_2 \rangle_F \\ &= \langle \mathbf{R}_1 \mathbf{Y} \mathbf{R}_2^\top, \mathbf{R}_1 \mathbf{Y} \mathbf{R}_2^\top \rangle_F \\ &= \|\mathbf{R}_1 \mathbf{Y} \mathbf{R}_2^\top\|_F^2. \end{aligned}$$

The thesis follows by square-rooting the extremal members of the previous chain of inequalities. □

In order to define the nuclear norm, let us consider the family of Schatten/von Neumann  $\nu$ -norms,  $\nu \geq 1$ , since the nuclear norm can be retrieved as a particular case.

**Definition 1** (Schatten/von Neumann  $\nu$  norms). *Fix  $\nu \in [1, +\infty[$  arbitrary chosen<sup>1</sup>. For any  $m \times n$  matrix  $\mathbf{Y}$  we define the Schatten/von Neumann  $\nu$ -norm*

$$\|\mathbf{Y}\|_{S,\nu} = \left( \sum_{i=1}^n [\sigma_i(\mathbf{Y})]^\nu \right)^{1/\nu} \quad (40)$$

where  $\sigma_i(\mathbf{Y})$  are the singular values of  $\mathbf{Y}$  and we assume  $m \geq n$ , the latter hypothesis being non restrictive upon matrix inversion.

**Lemma 2.** *When  $\nu = 2$ , the Schatten/von Neumann norm  $\|\cdot\|_{S,2}$  equals the Frobenius norm  $\|\cdot\|_F$ .*

*Proof.* Consider the singular value decomposition

$$\mathbf{Y} = \mathbf{L} \mathbf{\Sigma} \mathbf{R}^\top, \quad (41)$$

where  $\mathbf{\Sigma}$  stacks  $\sigma_1(\mathbf{Y}), \dots, \sigma_n(\mathbf{Y})$  on the diagonal. By definition

$$\|\mathbf{Y}\|_{S,2}^2 = \sum_{i=1}^n [\sigma_i(\mathbf{Y})]^2 \quad (42)$$

and by definition of Frobenius norm

$$\|\mathbf{Y}\|_{S,2}^2 = \|\mathbf{\Sigma}\|_F^2. \quad (43)$$

By using (39) and (41),

$$\|\mathbf{\Sigma}\|_F^2 = \|\mathbf{L} \mathbf{\Sigma} \mathbf{R}^\top\|_F^2 = \|\mathbf{Y}\|_F^2, \quad (44)$$

<sup>1</sup>Although the case  $n\infty = +\infty$  is allowed in the literature, we will skip it here for simplicity

which is the thesis. □

**Definition 2.** *Nuclear norm* For any  $m \times n$  matrix  $\mathbf{Y}$ , let us define the nuclear norm as

$$\|\mathbf{Y}\|_{\star} = \sum_{i=1}^n \sigma_i(\mathbf{Y}), \quad (45)$$

being  $\sigma_i(\mathbf{Y})$  the singular values of  $\mathbf{Y}$ ,  $i = 1, \dots, n$ .

**Proposition 5.** For any  $p > 0$ ,

$$\|\mathbf{Y}\|_{\star} = \underset{\mathbf{U}, \mathbf{V}: \mathbf{UV}^{\top} = \mathbf{Y}}{\text{minimum}} \|\mathbf{U}\|_F \|\mathbf{V}\|_F \quad (46)$$

*Proof.* We will demonstrate the thesis by proving that

$$\|\mathbf{Y}\|_{\star} \leq \underset{\mathbf{U}, \mathbf{V}: \mathbf{UV}^{\top} = \mathbf{Y}}{\text{minimum}} \|\mathbf{U}\|_F \|\mathbf{V}\|_F \quad (47)$$

and

$$\underset{\mathbf{U}, \mathbf{V}: \mathbf{UV}^{\top} = \mathbf{Y}}{\text{minimum}} \|\mathbf{U}\|_F \|\mathbf{V}\|_F \leq \|\mathbf{Y}\|_{\star} \quad (48)$$

hold at the same time

• *Proof of (47).* For a generic  $d$ , let  $\mathbf{U}$  and  $\mathbf{V}$  two  $m \times d$  and  $n \times d$  dimensional matrices, respectively, such that  $\mathbf{Y} = \mathbf{UV}^{\top}$ . Then,

$$\|\mathbf{Y}\|_{\star} = \|\mathbf{UV}^{\top}\|_{\star} \quad (49)$$

and

$$\|\mathbf{Y}\|_{\star} = \sum_{i=1}^n \sigma_i(\mathbf{UV}^{\top}) \quad (50)$$

by definition of nuclear norm (45). Let

$$\rho = \text{rank}(\mathbf{Y}) = \text{rank}(\mathbf{UV}^{\top}) \leq \min(\text{rank}(\mathbf{U}), \text{rank}(\mathbf{V})). \quad (51)$$

Then,

$$\|\mathbf{Y}\|_{\star} = \sum_{i=1}^{\rho} \sigma_i(\mathbf{UV}^{\top}), \quad (52)$$

since  $\sigma_{\rho+1}(\mathbf{Y}) = \dots = \sigma_n(\mathbf{Y}) = 0$ . Use Von Neumann inequality

$$\|\mathbf{Y}\|_{\star} \leq \sum_{i=1}^{\rho} \sigma_i(\mathbf{U}) \sigma_i(\mathbf{V}) \quad (53)$$

Apply Cauchy-Schwartz inequality.

$$\|\mathbf{Y}\|_{\star} \leq \sqrt{\sum_{i=1}^{\rho} \sigma_i(\mathbf{U})^2} \sqrt{\sum_{j=1}^{\rho} \sigma_j(\mathbf{V})^2}. \quad (54)$$

The square-rooting is an increasing function. Therefore, through (51),

$$\|\mathbf{Y}\|_{\star} \leq \sqrt{\sum_{i=1}^{\rho} \sigma_i(\mathbf{U})^2} \sqrt{\sum_{j=1}^{\text{rank}(\mathbf{V})} \sigma_j(\mathbf{V})^2} \leq \sqrt{\sum_{i=1}^{\text{rank}(\mathbf{U})} \sigma_i(\mathbf{U})^2} \sqrt{\sum_{j=1}^{\text{rank}(\mathbf{V})} \sigma_j(\mathbf{V})^2}, \quad (55)$$

since adding non-negative addends to the summations. Hence, using (40) with  $\nu = 2$ ,

$$\|\mathbf{Y}\|_{\star} \leq \|\mathbf{U}\|_{\mathcal{S},2} \|\mathbf{V}\|_{\mathcal{S},2}. \quad (56)$$

Apply Lemma 2.

$$\|\mathbf{Y}\|_{\star} \leq \|\mathbf{U}\|_F \|\mathbf{V}\|_F. \quad (57)$$

Consider an arbitrary  $p > 0$ , then

$$\|\mathbf{Y}\|_{\star} \leq \|\mathbf{U}\|_F \|\mathbf{V}\|_F. \quad (58)$$

Since  $d$ ,  $\mathbf{U}$  and  $\mathbf{V}$  are generic, we can minimize both terms with respect to them. In this case, the inequality is trivially preserved. Then,

$$\|\mathbf{Y}\|_{\star} \leq \underset{\mathbf{U}, \mathbf{V}: \mathbf{U}\mathbf{V}^{\top} = \mathbf{Y}}{\text{minimum}} \|\mathbf{U}\|_F \|\mathbf{V}\|_F, \quad (59)$$

obtaining (47).

- *Proof of (48).* Consider a thin singular value decomposition  $\mathbf{Y} = \mathbf{L}\mathbf{\Sigma}\mathbf{R}^{\top}$  for  $\mathbf{Y}$  and let us choose

$$\bar{\mathbf{U}} = \mathbf{L}\mathbf{\Sigma}^{1/2} \quad \text{and} \quad \bar{\mathbf{V}} = \mathbf{R}\mathbf{\Sigma}^{1/2}, \quad (60)$$

being  $\mathbf{\Sigma}^{1/2}$  the diagonal matrix obtaining from  $\mathbf{\Sigma}$  entrywise square-rooting all its entries. Note that

$$\bar{\mathbf{U}}\bar{\mathbf{V}}^{\top} = \mathbf{L}\mathbf{\Sigma}^{1/2} \left( \mathbf{R}\mathbf{\Sigma}^{1/2} \right)^{\top} = \mathbf{L}\mathbf{\Sigma}^{1/2} \mathbf{\Sigma}^{1/2} \mathbf{R}^{\top} = \mathbf{L}\mathbf{\Sigma}\mathbf{R}^{\top} = \mathbf{Y}. \quad (61)$$

Hence,

$$\underset{\mathbf{U}, \mathbf{V}: \mathbf{U}\mathbf{V}^{\top} = \mathbf{Y}}{\text{minimum}} \|\mathbf{U}\|_F \|\mathbf{V}\|_F \leq \|\bar{\mathbf{U}}\|_F \|\bar{\mathbf{V}}\|_F \quad (62)$$

and

$$\underset{\mathbf{U}, \mathbf{V}}{\text{minimum}} \|\mathbf{U}\|_F \|\mathbf{V}\|_F \leq \|\mathbf{\Sigma}^{1/2}\|_F \|\mathbf{\Sigma}^{1/2}\|_F \quad (63)$$

by using (39) in the right member. Then

$$\underset{\mathbf{U}, \mathbf{V}: \mathbf{U}\mathbf{V}^{\top} = \mathbf{Y}}{\text{minimum}} \|\mathbf{U}\|_F \|\mathbf{V}\|_F \leq \left( \|\mathbf{\Sigma}^{1/2}\|_F \right)^{2p}. \quad (64)$$

Observe that

$$\left( \|\mathbf{\Sigma}^{1/2}\|_F \right)^{2p} = \left( \sum_{i=1}^{\text{rank}(\mathbf{Y})} \left( \sqrt{\sigma_i(\mathbf{Y})} \right)^2 \right)^p = \left( \sum_{i=1}^{\text{rank}(\mathbf{Y})} \sigma_i(\mathbf{Y}) \right)^p = \text{trace}(\mathbf{\Sigma})^p \quad (65)$$

Thus, by means of the definition of nuclear norm (45),

$$\begin{aligned} \underset{\mathbf{U}, \mathbf{V}: \mathbf{U}\mathbf{V}^{\top} = \mathbf{Y}}{\text{minimum}} \|\mathbf{U}\|_F \|\mathbf{V}\|_F &\leq \text{trace}(\mathbf{\Sigma}) \\ &= \|\mathbf{Y}\|_{\star} \end{aligned} \quad (66)$$

which gives (48). □

We can achieve one other equivalent expression for the nuclear norm as in Prop. 5. In order to do this, let us consider the following necessary technical result.

**Lemma 3.** For any  $a, b \in \mathbb{R}$ , and  $p > 0$

$$(2ab) = \underset{\eta > 0}{\text{minimum}} \left( \frac{a^2}{\eta} + \eta b^2 \right) \quad (67)$$

*Proof.* Fix arbitrary  $a, b \in \mathbb{R}$  and  $\eta > 0$ . Then

$$0 \leq (a - \eta b)^2,$$

$$0 \leq a^2 - 2\eta ab + \eta^2 b^2,$$

$$2\eta ab \leq a^2 + \eta^2 b^2.$$

Divide each term by  $\eta > 0$ .

$$2ab \leq \frac{a^2}{\eta} + \eta b^2.$$

The inequality is preserved after  $p$ -th order exponentiation,  $p > 0$ .

$$(2ab) \leq \left( \frac{a^2}{\eta} + \eta b^2 \right).$$

Thus, the function  $f_{a,b}(\eta) = \left( \frac{a^2}{\eta} + \eta b^2 \right)$  upper bounds  $(2ab)$  for any  $a, b, \eta$ . Then, since

$$f_{a,b}(a/b) = \left( \frac{a^2}{a} b + \frac{a}{b} b^2 \right) = (ab + ab) = (2ab), \quad (68)$$

we get the thesis by using the definition of minimum. □

**Proposition 6.** For any  $p > 0$ ,

$$\|\mathbf{Y}\|_{\star} = \underset{\mathbf{U}, \mathbf{V}: \mathbf{UV}^{\top} = \mathbf{Y}}{\text{minimum}} \frac{1}{2} (\|\mathbf{U}\|_F^2 + \|\mathbf{V}\|_F^2) \quad (69)$$

*Proof.* It is enough to observe that, for any matrix  $\mathbf{U}$  and  $\mathbf{V}$  such that  $\mathbf{UV}^{\top} = \mathbf{Y}$ , also  $\mathbf{U}/\sqrt{\eta}$  and  $\sqrt{\eta}\mathbf{V}$  still satisfy the same property,  $\eta > 0$ . Then, for any arbitrary  $\eta > 0$ ,

$$\underset{\mathbf{U}, \mathbf{V}: \mathbf{UV}^{\top} = \mathbf{Y}}{\text{minimum}} \frac{1}{2} (\|\mathbf{U}\|_F^2 + \|\mathbf{V}\|_F^2) = \underset{\mathbf{U}, \mathbf{V}: \mathbf{UV}^{\top} = \mathbf{Y}}{\text{minimum}} \left( \frac{1}{2} \frac{\|\mathbf{U}\|_F^2}{\eta} + \frac{1}{2} \eta \|\mathbf{V}\|_F^2 \right) \quad (70)$$

Minimize over  $\eta$  and apply (67).

$$\underset{\mathbf{U}, \mathbf{V}: \mathbf{UV}^{\top} = \mathbf{Y}}{\text{minimum}} \frac{1}{2} (\|\mathbf{U}\|_F^2 + \|\mathbf{V}\|_F^2) = \underset{\mathbf{U}, \mathbf{V}: \mathbf{UV}^{\top} = \mathbf{Y}}{\text{minimum}} (\|\mathbf{U}\|_F \|\mathbf{V}\|_F). \quad (71)$$

The thesis is direct corollary of Prop. 5. □

**Proposition 7.** For any  $p > 0$ ,

$$\|\mathbf{Y}\|_{\star} = \underset{\mathbf{U}, \mathbf{V}: \mathbf{UV}^{\top} = \mathbf{Y}}{\text{minimum}} \frac{1}{2} \left( \sum_{k=1}^d \|\mathbf{u}_k\|_2^2 + \sum_{k=1}^d \|\mathbf{v}_k\|_2^2 \right), \quad (72)$$

where  $\mathbf{u}_k \in \mathbb{R}^m$  and  $\mathbf{v}_k \in \mathbb{R}^n$  denote the  $k$ -th column of  $\mathbf{U}$  and  $\mathbf{V}$ , respectively.

*Proof.* It follows by applying (69) and observing that

$$\|\mathbf{U}\|_F^2 + \|\mathbf{V}\|_F^2 = \sum_{k=1}^d \|\mathbf{u}_k\|_2^2 + \sum_{k=1}^d \|\mathbf{v}_k\|_2^2 \quad (73)$$

□

**Proposition 8.**

$$\|\mathbf{Y}\|_{\star} = \underset{\mathbf{U}, \mathbf{V}: \mathbf{UV}^{\top} = \mathbf{Y}}{\text{minimum}} \sum_{k=1}^d \|\mathbf{u}_k\|_2 \|\mathbf{v}_k\|_2, \quad (74)$$

where  $\mathbf{u}_k \in \mathbb{R}^m$  and  $\mathbf{v}_k \in \mathbb{R}^n$  denote the  $k$ -th column of  $\mathbf{U}$  and  $\mathbf{V}$ , respectively.

*Proof.* Apply (67) for any  $k = 1, \dots, d$ . Then,

$$\|\mathbf{u}_k\|_2 \|\mathbf{v}_k\|_2 = \underset{\eta_k > 0}{\text{minimum}} \left( \frac{1}{2} \frac{\|\mathbf{u}_k\|_2^2}{\eta_k} + \eta_k \|\mathbf{v}_k\|_2^2 \right). \quad (75)$$

Since we have a decoupled minimization problem, we can commute summation and minimum, rewriting

$$\sum_{k=1}^d \|\mathbf{u}_k\|_2 \|\mathbf{v}_k\|_2 = \sum_{k=1}^d \underset{\eta_k > 0}{\text{minimum}} \left( \frac{1}{2} \frac{\|\mathbf{u}_k\|_2^2}{\eta_k} + \eta_k \|\mathbf{v}_k\|_2^2 \right) \quad (76)$$

into

$$\sum_{k=1}^d \|\mathbf{u}_k\|_2 \|\mathbf{v}_k\|_2 = \underset{\eta_1, \dots, \eta_d > 0}{\text{minimum}} \left( \frac{1}{2} \sum_{k=1}^d \frac{\|\mathbf{u}_k\|_2^2}{\eta_k} + \sum_{k=1}^d \eta_k \|\mathbf{v}_k\|_2^2 \right). \quad (77)$$

Minimize both terms with respect to  $d$ ,  $\mathbf{U}$  and  $\mathbf{V}$ .

$$\begin{aligned} & \underset{\mathbf{U}, \mathbf{V}: \mathbf{UV}^{\top} = \mathbf{Y}}{\text{minimum}} \sum_{k=1}^d \|\mathbf{u}_k\|_2 \|\mathbf{v}_k\|_2 \\ &= \underset{\eta_1, \dots, \eta_d > 0, d, \mathbf{U}, \mathbf{V}: \mathbf{UV}^{\top} = \mathbf{Y}}{\text{minimum}} \left( \frac{1}{2} \sum_{k=1}^d \frac{\|\mathbf{u}_k\|_2^2}{\eta_k} + \sum_{k=1}^d \eta_k \|\mathbf{v}_k\|_2^2 \right). \end{aligned} \quad (78)$$

Equivalently,

$$\begin{aligned} & \underset{\mathbf{U}, \mathbf{V}: \mathbf{UV}^{\top} = \mathbf{Y}}{\text{minimum}} \sum_{k=1}^d \|\mathbf{u}_k\|_2 \|\mathbf{v}_k\|_2 \\ &= \underset{\eta_1, \dots, \eta_d > 0, d, \mathbf{U}, \mathbf{V}: \mathbf{UV}^{\top} = \mathbf{Y}}{\text{minimum}} \left( \frac{1}{2} \sum_{k=1}^d \|\mathbf{u}_k / \sqrt{\eta_k}\|_2^2 + \|\sqrt{\eta_k} \mathbf{v}_k\|_2^2 \right). \end{aligned} \quad (79)$$

We can discard the factors  $\eta_k$  exploiting the condition  $\mathbf{UV}^{\top} = \mathbf{Y}$ .

$$\underset{\mathbf{U}, \mathbf{V}: \mathbf{UV}^{\top} = \mathbf{Y}}{\text{minimum}} \sum_{k=1}^d \|\mathbf{u}_k\|_2 \|\mathbf{v}_k\|_2 = \underset{d, \mathbf{U}, \mathbf{V}: \mathbf{UV}^{\top} = \mathbf{Y}}{\text{minimum}} \left( \frac{1}{2} \sum_{k=1}^d \|\mathbf{u}_k\|_2^2 + \|\mathbf{v}_k\|_2^2 \right).$$

We get

$$\underset{\mathbf{U}, \mathbf{V}: \mathbf{UV}^{\top} = \mathbf{Y}}{\text{minimum}} \sum_{k=1}^d \|\mathbf{u}_k\|_2 \|\mathbf{v}_k\|_2 = \|\mathbf{Y}\|_{\star}$$

by means of (72). □

**Observation.** Due to the fact that, in all previous formulas,  $d$  was fixed and generic, the variational forms still apply if we select  $d$  to be the arg minimum of the objective functions whose minimization over  $\mathbf{U}$  and  $\mathbf{V}$  gives the variational forms itself. Therefore,

$$\|\mathbf{X}\|_\star = \min_{d \geq \rho(\mathbf{X}), \mathbf{U} \in \mathbb{R}^{m \times d}, \mathbf{V} \in \mathbb{R}^{n \times d}: \mathbf{UV}^\top = \mathbf{X}} \frac{1}{2} (\|\mathbf{U}\|_F^2 + \|\mathbf{V}\|_F^2) \quad (80)$$

$$= \min_{d \geq \rho(\mathbf{X}), \mathbf{U} \in \mathbb{R}^{m \times d}, \mathbf{V} \in \mathbb{R}^{n \times d}: \mathbf{UV}^\top = \mathbf{X}} \|\mathbf{U}\|_F \|\mathbf{V}\|_F \quad (81)$$

$$= \min_{d \geq \rho(\mathbf{X}), \mathbf{U} \in \mathbb{R}^{m \times d}, \mathbf{V} \in \mathbb{R}^{n \times d}: \mathbf{UV}^\top = \mathbf{X}} \frac{1}{2} \left( \sum_{k=1}^d \|\mathbf{u}_k\|_2^2 + \sum_{k=1}^d \|\mathbf{v}_k\|_2^2 \right) \quad (82)$$

$$= \min_{d \geq \rho(\mathbf{X}), \mathbf{U} \in \mathbb{R}^{m \times d}, \mathbf{V} \in \mathbb{R}^{n \times d}: \mathbf{UV}^\top = \mathbf{X}} \sum_{k=1}^d \|\mathbf{u}_k\|_2 \|\mathbf{v}_k\|_2. \quad (83)$$

#### 4 (Lower) convex envelope of the regularizer

**Proposition 9.** *The convex envelope of  $\frac{1}{2}\|\mathbf{X}\|_\Delta^2$  is  $\frac{1-p}{2p}\|\mathbf{X}\|_\star^2$ .*

*Proof.* First, recall that the convex envelope of a function  $f$  is the largest closed, convex function  $g$  such that  $g(x) \leq f(x)$  for all  $x$  and is given by  $g = (f^*)^*$ , where  $f^*$  denotes the Fenchel dual of  $f$ , defined as  $f^*(q) \equiv \sup_x \langle q, x \rangle - f(x)$ . Let  $\Theta(\mathbf{X}) = \frac{1}{2}\|\mathbf{X}\|_\Delta^2$ , given by

$$\Theta(\mathbf{X}) = \inf_{\substack{d \geq \rho(\mathbf{X}) \\ \mathbf{U} \in \mathbb{R}^{m \times d} \\ \mathbf{V} \in \mathbb{R}^{n \times d} \\ \text{s.t. } \mathbf{UV}^\top = \mathbf{X}}} \frac{\lambda_d}{2} \sum_{k=1}^d \|\mathbf{u}_k\|_2 \|\mathbf{v}_k\|_2. \quad (84)$$

and note that this can be equivalently written by the equation

$$\Theta(\mathbf{X}) = \inf_{\substack{d \geq \rho(\mathbf{X}) \\ \mathbf{U} \in \mathbb{R}^{m \times d} \\ \mathbf{V} \in \mathbb{R}^{n \times d} \\ \Lambda \in \mathbb{R}^d}} \frac{\lambda_d}{2} \|\Lambda\|_2^2 \quad \text{s.t.} \quad \sum_{k=1}^d \Lambda_k \mathbf{u}_k \mathbf{v}_k^T = \mathbf{X} \quad \text{and} \quad (\|\mathbf{u}_k\|_2, \|\mathbf{v}_k\|_2) \leq (1, 1) \quad \forall k. \quad (85)$$

This gives the Fenchel dual of  $\Theta$  as

$$\Theta^*(\mathbf{Q}) = \sup_d \sup_{\substack{\mathbf{U} \in \mathbb{R}^{m \times d} \\ \mathbf{V} \in \mathbb{R}^{n \times d} \\ \Lambda \in \mathbb{R}^d}} \sum_{k=1}^d \Lambda_k \langle \mathbf{Q}, \mathbf{u}_k \mathbf{v}_k^T \rangle - \frac{\lambda_d}{2} \|\Lambda\|_2^2 \quad \text{s.t.} \quad (\|\mathbf{u}_k\|_2, \|\mathbf{v}_k\|_2) \leq (1, 1) \quad \forall k. \quad (86)$$

Now, note that if we define the vector  $\mathbf{B}_d(\mathbf{U}, \mathbf{V}) \in \mathbb{R}^d$  as

$$\mathbf{B}_d(\mathbf{U}, \mathbf{V}) = \begin{bmatrix} \langle \mathbf{Q}, \mathbf{u}_1 \mathbf{v}_1^T \rangle \\ \langle \mathbf{Q}, \mathbf{u}_2 \mathbf{v}_2^T \rangle \\ \vdots \\ \langle \mathbf{Q}, \mathbf{u}_d \mathbf{v}_d^T \rangle \end{bmatrix}, \quad (87)$$

then from (86) we have that

$$\Theta^*(\mathbf{Q}) = \sup_d \sup_{\substack{\mathbf{U} \in \mathbb{R}^{m \times d} \\ \mathbf{V} \in \mathbb{R}^{n \times d}}} \sup_{\Lambda \in \mathbb{R}^d} \langle \mathbf{B}_d(\mathbf{U}, \mathbf{V}), \Lambda \rangle - \frac{\lambda_d}{2} \|\Lambda\|_2^2 \quad \text{s.t.} \quad (\|\mathbf{u}_k\|_2, \|\mathbf{v}_k\|_2) \leq (1, 1) \quad \forall k \quad (88)$$

$$= \sup_d \sup_{\substack{\mathbf{U} \in \mathbb{R}^{m \times d} \\ \mathbf{V} \in \mathbb{R}^{n \times d}}} \frac{1}{2\lambda_d} \|\mathbf{B}_d(\mathbf{U}, \mathbf{V})\|_2^2 \quad \text{s.t.} \quad (\|\mathbf{u}_k\|_2, \|\mathbf{v}_k\|_2) \leq (1, 1) \quad \forall k. \quad (89)$$

where the final equality comes from noting that the supremum w.r.t.  $\Lambda$  is the definition of the Fenchel dual of the squared  $\ell_2$  norm evaluated at  $\mathbf{B}_d(\mathbf{U}, \mathbf{V})$ .

Now, from (89) and the definition of  $\mathbf{B}_d(\mathbf{U}, \mathbf{V})$  note that for a fixed value of  $d$ , (89) is optimized w.r.t.  $(\mathbf{U}, \mathbf{V})$  by choosing all the columns of  $(\mathbf{U}, \mathbf{V})$  to be equal to the maximum singular vector pair, given by

$$\sup_{\mathbf{u} \in \mathbb{R}^m, \mathbf{v} \in \mathbb{R}^n} \langle \mathbf{Q}, \mathbf{u}\mathbf{v}^T \rangle \quad \text{s.t.} \quad (\|\mathbf{u}\|_2, \|\mathbf{v}\|_2) \leq (1, 1). \quad (90)$$

Note also that for this optimal choice of  $(\mathbf{U}, \mathbf{V})$  we have that  $\mathbf{B}_d(\mathbf{U}, \mathbf{V}) = \sigma(\mathbf{Q})\mathbf{1}_d$  where  $\sigma(\mathbf{Q})$  denotes the largest singular value of  $\mathbf{Q}$  and  $\mathbf{1}_d$  is a vector of all ones of size  $d$ . Plugging this in (89) gives

$$\Theta^*(\mathbf{Q}) = \sup_d \frac{1}{2\lambda_d} \|\sigma(\mathbf{Q})\mathbf{1}_d\|_2^2 = \sup_d \frac{\sigma^2(\mathbf{Q})d}{2\lambda_d} = \left( \frac{p}{1-p} \right) \frac{\sigma^2(\mathbf{Q})}{2}, \quad (91)$$

where recall  $\lambda_d = d(1-p)/p$ . The result then follows by noting the well-known duality between the spectral norm (largest singular value) and the nuclear norm and basic properties of the Fenchel dual.  $\square$

## 5 Optimal dropout for MF satisfies the optimality conditions for the convex lower bound

For a fixed  $\mathbf{Y} \in \mathbb{R}^{m \times n}$ , find  $\mathbf{U} \in \mathbb{R}^{m \times d}$ , and  $\mathbf{V} \in \mathbb{R}^{n \times d}$ ,  $d \geq \text{rank}(\mathbf{Y})$ , consider the dropout problem

$$\min_{\mathbf{U}, \mathbf{V}, d} \mathbb{E}_{\mathbf{r}} \left\| \mathbf{Y} - \frac{1}{\theta} \mathbf{U} \text{diag}(\mathbf{r}) \mathbf{V}^\top \right\|_F^2, \quad (92)$$

where  $\mathbf{r}$  is a  $d$ -dimensional random vector with i.i.d. Bernoulli( $\theta$ ) entries,  $0 < \theta < 1$ . We know that

$$\mathbb{E}_{\mathbf{r}} \left\| \mathbf{Y} - \frac{1}{\theta} \mathbf{U} \text{diag}(\mathbf{r}) \mathbf{V}^\top \right\|_F^2 = \|\mathbf{Y} - \mathbf{U} \mathbf{V}^\top\|_F^2 + \frac{1-\theta}{\theta} \sum_{k=1}^d \|\mathbf{u}_k\|_2^2 \|\mathbf{v}_k\|_2^2 \quad (93)$$

and for a particular choice  $\theta = \theta(d)$ , we get

$$\mathbb{E}_{\mathbf{r}} \left\| \mathbf{Y} - \frac{1}{\theta(d)} \mathbf{U} \text{diag}(\mathbf{r}) \mathbf{V}^\top \right\|_F^2 = \|\mathbf{Y} - \mathbf{U} \mathbf{V}^\top\|_F^2 + d \frac{1-p}{p} \sum_{k=1}^d \|\mathbf{u}_k\|_2^2 \|\mathbf{v}_k\|_2^2 \quad (94)$$

**Definition 3** (Convex envelope). *The convex envelope of a real-valued function  $f$  is the largest closed, convex function  $g$  such that  $g \leq f$ .*

**Definition 4.** *Fix  $\mathbf{Y} \in \mathbb{R}^{m \times n}$  arbitrary. Then, for any integer  $d \geq \text{rank}(\mathbf{Y})$  and  $\mathbf{U} \in \mathbb{R}^{m \times d}$ ,  $\mathbf{V} \in \mathbb{R}^{n \times d}$ , define*

$$\Omega(\mathbf{Y}) = \inf_{d, \mathbf{U}, \mathbf{V}} d \frac{1-p}{p} \sum_{k=1}^d \|\mathbf{u}_k\|_2^2 \|\mathbf{v}_k\|_2^2 \quad \text{s.t.} \quad \mathbf{U} \mathbf{V}^\top = \mathbf{Y}. \quad (95)$$

**Proposition 10.** *The convex envelope of  $\frac{1}{2} \Omega(\mathbf{Y})$  is  $\frac{1-p}{2p} \|\mathbf{Y}\|_\star^2$ .*

• If we can show that a local minimum of

$$f(\mathbf{U}, \mathbf{V}, d) = \left[ \|\mathbf{Y} - \mathbf{U} \mathbf{V}^\top\|_F^2 + d \frac{1-p}{p} \sum_{k=1}^d \|\mathbf{u}_k\|_2^2 \|\mathbf{v}_k\|_2^2 \right] \quad (96)$$

satisfies the optimality conditions for its lower bound

$$f(\mathbf{U}, \mathbf{V}, d) \geq F(\mathbf{X}) = \|\mathbf{X} - \mathbf{Y}\|_F^2 + \frac{1-p}{p} \|\mathbf{X}\|_\star^2, \quad (97)$$

then we know we've also found a global minimum of (96).

**Lemma 4.** *Let  $(\bar{\mathbf{U}}, \bar{\mathbf{V}}, \bar{d})$  a local minimizer of (96). Then,*

$$\langle \mathbf{Y} - \bar{\mathbf{U}} \bar{\mathbf{V}}^\top, \bar{\mathbf{U}} \bar{\mathbf{V}}^\top \rangle = \bar{d} \frac{1-p}{p} \sum_{k=1}^{\bar{d}} \|\bar{\mathbf{u}}_k\|_2^2 \|\bar{\mathbf{v}}_k\|_2^2 \quad (98)$$

*Proof.* Since  $(\bar{\mathbf{U}}, \bar{\mathbf{V}})$  is a local minimizer of  $f(\mathbf{U}, \mathbf{V}, \bar{d})$ , then there exists  $\delta > 0$  such that, for any  $\epsilon > 0$ ,  $\epsilon < \delta$ , we must have

$$f(\bar{\mathbf{U}}, \bar{\mathbf{V}}, \bar{d}) \leq f(\bar{\mathbf{U}} + \epsilon \bar{\mathbf{U}}, \bar{\mathbf{V}} + \epsilon \bar{\mathbf{V}}, \bar{d}) = f((1+\epsilon)\bar{\mathbf{U}}, (1+\epsilon)\bar{\mathbf{V}}, \bar{d}). \quad (99)$$

That is

$$\|\mathbf{Y} - \bar{\mathbf{U}} \bar{\mathbf{V}}^\top\|_F^2 + \bar{d} \frac{1-p}{p} \sum_{k=1}^{\bar{d}} \|\bar{\mathbf{u}}_k\|_2^2 \|\bar{\mathbf{v}}_k\|_2^2 \leq \|\mathbf{Y} - (1+\epsilon)^2 \bar{\mathbf{U}} \bar{\mathbf{V}}^\top\|_F^2 + \bar{d} \frac{1-p}{p} (1+\epsilon)^4 \sum_{k=1}^{\bar{d}} \|\bar{\mathbf{u}}_k\|_2^2 \|\bar{\mathbf{v}}_k\|_2^2. \quad (100)$$



Exploit the first order approximations  $(1 + \epsilon)^2 = 1 + 2\epsilon + O(\epsilon^2)$  and  $(1 + \epsilon)^4 = 1 + 4\epsilon + O(\epsilon^2)$ . Since  $\|\mathbf{A} + (1 + \epsilon)^2\mathbf{B}\|_F^2 = \|\mathbf{A} + (1 + 2\epsilon)\mathbf{B}\|_F^2 + O(\epsilon^2)$ ,

$$\|\mathbf{Y} - \bar{\mathbf{U}}\bar{\mathbf{V}}^\top\|_F^2 + d^{\frac{1-p}{p}} \sum_{k=1}^{\bar{d}} \|\bar{\mathbf{u}}_k\|_2^2 \|\bar{\mathbf{v}}_k\|_2^2 \leq \quad (101)$$

$$\|\mathbf{Y} - \bar{\mathbf{U}}\bar{\mathbf{V}}^\top - 2\epsilon\bar{\mathbf{U}}\bar{\mathbf{V}}^\top\|_F^2 + d^{\frac{1-p}{p}}(1 + 4\epsilon) \sum_{k=1}^{\bar{d}} \|\bar{\mathbf{u}}_k\|_2^2 \|\bar{\mathbf{v}}_k\|_2^2 + O(\epsilon^2) \quad (102)$$

and also, by deleting  $d^{\frac{1-p}{p}} \sum_{k=1}^{\bar{d}} \|\bar{\mathbf{u}}_k\|_2^2 \|\bar{\mathbf{v}}_k\|_2^2$  and rearranging terms,

$$0 \leq \|\mathbf{Y} - \bar{\mathbf{U}}\bar{\mathbf{V}}^\top - 2\epsilon\bar{\mathbf{U}}\bar{\mathbf{V}}^\top\|_F^2 - \|\mathbf{Y} - \bar{\mathbf{U}}\bar{\mathbf{V}}^\top\|_F^2 + 4\epsilon d^{\frac{1-p}{p}} \sum_{k=1}^{\bar{d}} \|\bar{\mathbf{u}}_k\|_2^2 \|\bar{\mathbf{v}}_k\|_2^2 + O(\epsilon^2). \quad (103)$$

Divide by  $\epsilon = 2\epsilon$ ,

$$0 \leq \frac{1}{\epsilon} (\|\mathbf{Y} - \bar{\mathbf{U}}\bar{\mathbf{V}}^\top - \epsilon\bar{\mathbf{U}}\bar{\mathbf{V}}^\top\|_F^2 - \|\mathbf{Y} - \bar{\mathbf{U}}\bar{\mathbf{V}}^\top\|_F^2) + 2d^{\frac{1-p}{p}} \sum_{k=1}^{\bar{d}} \|\bar{\mathbf{u}}_k\|_2^2 \|\bar{\mathbf{v}}_k\|_2^2 + O(\epsilon). \quad (104)$$

Take the limit as  $\epsilon \rightarrow 0$  and use the definition of one-sided directional derivative for a differentiable function  $h$

$$\langle \nabla h(\mathbf{x}), \mathbf{d} \rangle = \nabla_{\mathbf{d}} h(\mathbf{x}) = \lim_{\epsilon \rightarrow 0} \frac{h(\mathbf{x} + \epsilon\mathbf{d}) - h(\mathbf{x})}{\epsilon} \quad (105)$$

for  $h(\cdot) = \|\mathbf{Y} - \cdot\|_F^2$ ,  $\mathbf{x} = \bar{\mathbf{U}}\bar{\mathbf{V}}^\top$  and  $\mathbf{d} = \bar{\mathbf{U}}\bar{\mathbf{V}}^\top$ . Then,

$$0 \leq \langle [\nabla_{\mathbf{x}} \|\mathbf{X} - \mathbf{Y}\|_F^2] (\bar{\mathbf{U}}\bar{\mathbf{V}}^\top), \bar{\mathbf{U}}\bar{\mathbf{V}}^\top \rangle + 2d^{\frac{1-p}{p}} \sum_{k=1}^{\bar{d}} \|\bar{\mathbf{u}}_k\|_2^2 \|\bar{\mathbf{v}}_k\|_2^2 \quad (106)$$

$$= 2 \langle \bar{\mathbf{U}}\bar{\mathbf{V}}^\top - \mathbf{Y}, \bar{\mathbf{U}}\bar{\mathbf{V}}^\top \rangle + 2d^{\frac{1-p}{p}} \sum_{k=1}^{\bar{d}} \|\bar{\mathbf{u}}_k\|_2^2 \|\bar{\mathbf{v}}_k\|_2^2 \quad (107)$$

and, once the factor 2 is simplified,

$$0 \leq -\langle \mathbf{Y} - \bar{\mathbf{U}}\bar{\mathbf{V}}^\top, \bar{\mathbf{U}}\bar{\mathbf{V}}^\top \rangle + d^{\frac{1-p}{p}} \sum_{k=1}^{\bar{d}} \|\bar{\mathbf{u}}_k\|_2^2 \|\bar{\mathbf{v}}_k\|_2^2. \quad (108)$$

Note that by  $\epsilon > 0$  and sufficiently small, we must also have,

$$f(\bar{\mathbf{U}}, \bar{\mathbf{V}}, \bar{d}) \leq f(\bar{\mathbf{U}} - \epsilon\bar{\mathbf{U}}, \bar{\mathbf{V}} - \epsilon\bar{\mathbf{V}}, \bar{d}) = f((1 - \epsilon)\bar{\mathbf{U}}, (1 - \epsilon)\bar{\mathbf{V}}, \bar{d}). \quad (109)$$

By applying the same steps as before, we get

$$0 \leq \frac{1}{\epsilon} (\|\mathbf{Y} - \bar{\mathbf{U}}\bar{\mathbf{V}}^\top + \epsilon\bar{\mathbf{U}}\bar{\mathbf{V}}^\top\|_F^2 - \|\mathbf{Y} - \bar{\mathbf{U}}\bar{\mathbf{V}}^\top\|_F^2) - 2d^{\frac{1-p}{p}} \sum_{k=1}^{\bar{d}} \|\bar{\mathbf{u}}_k\|_2^2 \|\bar{\mathbf{v}}_k\|_2^2 + O(\epsilon). \quad (110)$$

Take the limit as  $\epsilon \rightarrow 0$  and use the definition of directional derivative (105).

$$0 \leq \langle [\nabla_{\mathbf{x}} \|\mathbf{X} - \mathbf{Y}\|_F^2] (\bar{\mathbf{U}}\bar{\mathbf{V}}^\top), -\bar{\mathbf{U}}\bar{\mathbf{V}}^\top \rangle - 2d^{\frac{1-p}{p}} \sum_{k=1}^{\bar{d}} \|\bar{\mathbf{u}}_k\|_2^2 \|\bar{\mathbf{v}}_k\|_2^2 \quad (111)$$

$$= 2 \langle \bar{\mathbf{U}}\bar{\mathbf{V}}^\top - \mathbf{Y}, -\bar{\mathbf{U}}\bar{\mathbf{V}}^\top \rangle - 2d^{\frac{1-p}{p}} \sum_{k=1}^{\bar{d}} \|\bar{\mathbf{u}}_k\|_2^2 \|\bar{\mathbf{v}}_k\|_2^2 \quad (112)$$

$$= 2 \langle \mathbf{Y} - \bar{\mathbf{U}}\bar{\mathbf{V}}^\top, \bar{\mathbf{U}}\bar{\mathbf{V}}^\top \rangle - 2d^{\frac{1-p}{p}} \sum_{k=1}^{\bar{d}} \|\bar{\mathbf{u}}_k\|_2^2 \|\bar{\mathbf{v}}_k\|_2^2. \quad (113)$$

Simplify the common factor 2, after changing the signs,

$$0 \geq -\langle \mathbf{Y} - \mathbf{U}\mathbf{V}^\top, \bar{\mathbf{U}}\bar{\mathbf{V}}^\top \rangle + d^{\frac{1-p}{p}} \sum_{k=1}^{\bar{d}} \|\bar{\mathbf{u}}_k\|_2^2 \|\bar{\mathbf{v}}_k\|_2^2 \quad (114)$$

The thesis comes by combining (108) and (114).

**Theorem 1** (Necessary and sufficient conditions for local minima of (96) to be global for (97)). *Let  $(\bar{\mathbf{U}}, \bar{\mathbf{V}}, \bar{d})$  be a local minimizer of problem (96):*

$$\min_{\mathbf{U}, \mathbf{V}, d} \left[ \|\mathbf{Y} - \mathbf{U}\mathbf{V}^\top\|_F^2 + d^{\frac{1-p}{p}} \sum_{k=1}^d \|\mathbf{u}_k\|_2^2 \|\mathbf{v}_k\|_2^2 \right] \quad (115)$$

and consider its convex lower bound (97):

$$\min_{\mathbf{X}} \|\mathbf{X} - \mathbf{Y}\|_F^2 + \frac{1-p}{p} \|\mathbf{X}\|_\star^2, \quad (116)$$

- **Sufficient conditions.** Assume that

$$\|\bar{\mathbf{U}}\bar{\mathbf{V}}^\top\|_\star = \sqrt{d \sum_{k=1}^{\bar{d}} \|\bar{\mathbf{u}}_k\|_2^2 \|\bar{\mathbf{v}}_k\|_2^2} \quad (117)$$

and

$$\mathbf{p}^\top (\mathbf{Y} - \bar{\mathbf{U}}\bar{\mathbf{V}}^\top) \mathbf{q} \leq \frac{1-p}{p} \|\mathbf{p}\|_2 \|\mathbf{q}\|_2 \|\bar{\mathbf{U}}\bar{\mathbf{V}}^\top\|_\star \quad (118)$$

for any column vector  $\mathbf{p} \in \mathbb{R}^m$  and  $\mathbf{q} \in \mathbb{R}^n$ . Then  $\bar{\mathbf{U}}\bar{\mathbf{V}}^\top$  is a global minimizer for (97).

- **Necessary condition.** Assume that  $\bar{\mathbf{U}}\bar{\mathbf{V}}^\top$  is a global minimizer for (97). Then, (117) is satisfied.

*Proof.* • The first order optimality condition for

$$\min_{\mathbf{X}} \|\mathbf{X} - \mathbf{Y}\|_F^2 + \lambda \|\mathbf{X}\|_\star^2 \quad (119)$$

is

$$0 \in \nabla_{\mathbf{X}} \|\mathbf{X} - \mathbf{Y}\|_F^2 + \partial(\frac{1-p}{p} \|\mathbf{X}\|_\star^2) \quad (120)$$

$$\Leftrightarrow 0 \in 2(\mathbf{X} - \mathbf{Y}) + 2\frac{1-p}{p} \|\mathbf{X}\|_\star \partial\|\mathbf{X}\|_\star \quad (121)$$

$$\Leftrightarrow \mathbf{Y} - \mathbf{X} \in \frac{1-p}{p} \|\mathbf{X}\|_\star \partial\|\mathbf{X}\|_\star \quad (122)$$

$$\Leftrightarrow \frac{\mathbf{Y} - \mathbf{X}}{\frac{1-p}{p} \|\mathbf{X}\|_\star} \in \partial\|\mathbf{X}\|_\star. \quad (123)$$

Recall that

$$\partial\|\mathbf{X}\|_\star = \{ \mathbf{W} \in \mathbb{R}^{m \times n} : \langle \mathbf{X}, \mathbf{W} \rangle = \|\mathbf{X}\|_\star, \mathbf{p}^\top \mathbf{W} \mathbf{q} \leq \|\mathbf{p}\|_2 \|\mathbf{q}\|_2 \forall (\mathbf{p}, \mathbf{q}) \}. \quad (124)$$

Therefore, since (118) easily reads as the inequality in (124) for

$$\mathbf{W} = \frac{\mathbf{Y} - \bar{\mathbf{U}}\bar{\mathbf{V}}^\top}{\frac{1-p}{p} \|\bar{\mathbf{U}}\bar{\mathbf{V}}^\top\|_\star}, \quad (125)$$

the thesis will follow if we show

$$\left\langle \bar{\mathbf{U}}\bar{\mathbf{V}}^\top, \frac{\mathbf{Y} - \bar{\mathbf{U}}\bar{\mathbf{V}}^\top}{\frac{1-p}{p} \|\bar{\mathbf{U}}\bar{\mathbf{V}}^\top\|_\star} \right\rangle = \|\bar{\mathbf{U}}\bar{\mathbf{V}}^\top\|_\star \quad (126)$$

or, equivalently,

$$\langle \mathbf{Y} - \bar{\mathbf{U}}\bar{\mathbf{V}}^\top, \bar{\mathbf{U}}\bar{\mathbf{V}}^\top \rangle = \frac{1-p}{p} \|\bar{\mathbf{U}}\bar{\mathbf{V}}^\top\|_\star^2. \quad (127)$$

We can observe that (127) easily follows from (117) if considering equation (98) of Lemma 4.

- Let  $(\bar{\mathbf{U}}, \bar{\mathbf{V}}, \bar{d})$  be a global minimizer of (96) and assume that  $\bar{\mathbf{U}}\bar{\mathbf{V}}^\top$  satisfies the optimality conditions for (97).

Since  $(\bar{\mathbf{U}}, \bar{\mathbf{V}}, \bar{d})$  is a local minimizer of (96), then, thanks to Lemma 4, we have

$$\langle \mathbf{Y} - \bar{\mathbf{U}}\bar{\mathbf{V}}^\top, \bar{\mathbf{U}}\bar{\mathbf{V}}^\top \rangle = \bar{d} \frac{1-p}{p} \sum_{k=1}^{\bar{d}} \|\bar{\mathbf{u}}_k\|_2^2 \|\bar{\mathbf{v}}_k\|_2^2 \quad (128)$$

At the same time, since  $\bar{\mathbf{U}}\bar{\mathbf{V}}^\top$  satisfies the optimality conditions for (97), we have

$$\mathbf{Y} - \bar{\mathbf{U}}\bar{\mathbf{V}}^\top \in \frac{1-p}{p} \|\bar{\mathbf{U}}\bar{\mathbf{V}}^\top\|_* \partial \|\bar{\mathbf{U}}\bar{\mathbf{V}}^\top\|_* \quad (129)$$

Considering that

$$\partial \|\mathbf{X}\|_* = \{ \mathbf{W} : \langle \mathbf{X}, \mathbf{W} \rangle = \|\mathbf{X}\|_*, \mathbf{p}^\top \mathbf{W} \mathbf{q} \leq \|\mathbf{p}\|_2 \|\mathbf{q}\|_2 \forall (\mathbf{p}, \mathbf{q}) \}, \quad (130)$$

in particular,

$$\langle \mathbf{Y} - \bar{\mathbf{U}}\bar{\mathbf{V}}^\top, \bar{\mathbf{U}}\bar{\mathbf{V}}^\top \rangle = \frac{1-p}{p} \|\bar{\mathbf{U}}\bar{\mathbf{V}}^\top\|_*^2. \quad (131)$$

Combine (98) and (131), we get

$$\|\bar{\mathbf{U}}\bar{\mathbf{V}}^\top\|_*^2 = \bar{d} \sum_{k=1}^{\bar{d}} \|\bar{\mathbf{u}}_k\|_2^2 \|\bar{\mathbf{v}}_k\|_2^2 \quad (132)$$

and (117) follows by square-rooting each member of (132).  $\square$

**Lemma 5.** For any  $n \in \mathbb{N}_+$  and  $a_1, \dots, a_n \in \mathbb{R}$ , we get

$$\left( \sum_{k=1}^n a_k \right)^2 \leq n \sum_{k=1}^n a_k^2 \quad (133)$$

*Proof.* For any  $n$ -dimensional column vectors  $\mathbf{x}$  and  $\mathbf{y}$ , Cauchy-Schwartz inequality is

$$\mathbf{x}^\top \mathbf{y} \leq \|\mathbf{x}\|_2 \|\mathbf{y}\|_2 \quad (134)$$

and therefore

$$(\mathbf{x}^\top \mathbf{y})^2 \leq \|\mathbf{x}\|_2^2 \|\mathbf{y}\|_2^2. \quad (135)$$

The thesis follows by applying the previous inequality to the case  $\mathbf{x} = [a_1, \dots, a_n]^\top$  and  $\mathbf{y} = [1, \dots, 1]$ . Indeed, in such a case,

$$(\mathbf{x}^\top \mathbf{y})^2 = \sum_{k=1}^n a_k^2, \quad \|\mathbf{x}\|_2^2 = \sum_{k=1}^n a_k^2 \quad \text{and} \quad \|\mathbf{y}\|_2^2 = n. \quad (136)$$

$\square$

**Observation: a consequence of (117), i.e. another necessary condition.**

Assume that  $(\bar{\mathbf{U}}, \bar{\mathbf{V}}, \bar{d})$  is a local minimizer of (96), being at the same time  $\bar{\mathbf{U}}\bar{\mathbf{V}}^\top$  the global minimizer of (97). Then, for what we said, equation (117) is satisfied. That is,

$$\|\bar{\mathbf{U}}\bar{\mathbf{V}}^\top\|_* = \sqrt{\bar{d} \sum_{k=1}^{\bar{d}} \|\bar{\mathbf{u}}_k\|_2^2 \|\bar{\mathbf{v}}_k\|_2^2}. \quad (137)$$

Exploit the variational form of the nuclear norm to obtain

$$\sqrt{\bar{d} \sum_{k=1}^{\bar{d}} \|\bar{\mathbf{u}}_k\|_2^2 \|\bar{\mathbf{v}}_k\|_2^2} \leq \sum_{k=1}^{\bar{d}} \|\bar{\mathbf{u}}_k\|_2 \|\bar{\mathbf{v}}_k\|_2 \quad (138)$$

and, equivalently,

$$\bar{d} \sum_{k=1}^{\bar{d}} \|\bar{\mathbf{u}}_k\|_2^2 \|\bar{\mathbf{v}}_k\|_2^2 \leq \left( \sum_{k=1}^{\bar{d}} \|\bar{\mathbf{u}}_k\|_2 \|\bar{\mathbf{v}}_k\|_2 \right)^2. \quad (139)$$

Apply (133) for  $n = \bar{d}$  and  $a_k = \|\bar{\mathbf{u}}_k\|_2 \|\bar{\mathbf{v}}_k\|_2$ . Then

$$\left( \sum_{k=1}^{\bar{d}} \|\bar{\mathbf{u}}_k\|_2 \|\bar{\mathbf{v}}_k\|_2 \right)^2 \leq \bar{d} \sum_{k=1}^{\bar{d}} \|\bar{\mathbf{u}}_k\|_2^2 \|\bar{\mathbf{v}}_k\|_2^2. \quad (140)$$

By combining the last two inequalities, we get

$$\boxed{\bar{d} \sum_{k=1}^{\bar{d}} \|\bar{\mathbf{u}}_k\|_2^2 \|\bar{\mathbf{v}}_k\|_2^2 = \left( \sum_{k=1}^{\bar{d}} \|\bar{\mathbf{u}}_k\|_2 \|\bar{\mathbf{v}}_k\|_2 \right)^2} \quad (141)$$

### Analyzing the polar

We are interested in a better understanding of equation (118):

$$\mathbf{p}^\top (\mathbf{Y} - \bar{\mathbf{U}}\bar{\mathbf{V}}^\top) \mathbf{q} \leq \frac{1-p}{p} \|\mathbf{p}\|_2 \|\mathbf{q}\|_2 \|\bar{\mathbf{U}}\bar{\mathbf{V}}^\top\|_\star \quad \text{for all } \mathbf{p} \in \mathbb{R}^m \text{ and } \mathbf{q} \in \mathbb{R}^n. \quad (142)$$

Therefore, we will provide a few sufficient conditions built on top of the following technical result.

**Lemma 6.** For any  $\mathbf{A} \in \mathbb{R}^{m \times n}$  and  $\mathbf{x} \in \mathbb{R}^n$ ,

$$\|\mathbf{A}\mathbf{x}\|_2 \leq \|\mathbf{A}\|_2 \|\mathbf{x}\|_2 \quad (143)$$

$$\|\mathbf{A}\mathbf{x}\|_2 \leq \|\mathbf{A}\|_F \|\mathbf{x}\|_2 \quad (144)$$

$$\|\mathbf{A}\mathbf{x}\|_2 \leq \sqrt{mn} \|\mathbf{A}\|_{\max} \|\mathbf{x}\|_2 \quad (145)$$

*Proof of (143).* The thesis comes after the definition of operator norm,

$$\|\mathbf{A}\|_2 = \sup \left\{ \frac{\|\mathbf{A}\mathbf{x}\|_2}{\|\mathbf{x}\|_2} : \mathbf{x} \in \mathbb{R}^n, \mathbf{x} \neq \mathbf{0} \right\}. \quad (146)$$

*Proof of (144).* We get (144) from (143) by using the fact that  $\|\mathbf{A}\|_2 \leq \|\mathbf{A}\|_F$  through the following chain of inequalities.

$$\|\mathbf{A}\|_2^2 = \sigma_1(\mathbf{A})^2 = \max_i [\sigma_i(\mathbf{A})^2] = \max_i \lambda_i(\mathbf{A}^\top \mathbf{A}) \leq \sum_{i=1}^m \lambda_i(\mathbf{A}^\top \mathbf{A}) = \text{trace}(\mathbf{A}^\top \mathbf{A}) = \|\mathbf{A}\|_F^2. \quad (147)$$

*Proof of (145).* By definition of Euclidean norm,

$$\|\mathbf{A}\mathbf{x}\|_2^2 = \sum_{i=1}^m \left( \sum_{j=1}^n A_{ij} x_j \right)^2. \quad (148)$$

For any  $i = 1, \dots, m$  apply (133).

$$\begin{aligned} \|\mathbf{A}\mathbf{x}\|_2^2 &\leq n \sum_{i=1}^m \sum_{j=1}^n A_{ij}^2 x_j^2 \leq n \sum_{i=1}^m \sum_{j=1}^n \max_{p,q} A_{pq}^2 x_j^2 \\ &= mn \max_{p,q} A_{pq}^2 \sum_{j=1}^n x_j^2 = mn \max_{p,q} A_{pq}^2 \|\mathbf{x}\|_2^2. \end{aligned} \quad (149)$$

The thesis comes by square-rooting the extremal terms in the chain of equalities (149) and noticing that

$$\sqrt{\max_{p,q} A_{pq}^2} = \max_{p,q} |A_{pq}| = \|\mathbf{A}\|_{\max}. \quad (150)$$

□

**Proposition 11.** Equation (118):

$$\mathbf{p}^\top (\mathbf{Y} - \mathbf{UV}^\top) \mathbf{q} \leq \frac{1-p}{p} \|\mathbf{p}\|_2 \|\mathbf{q}\|_2 \|\mathbf{UV}^\top\|_* \quad (151)$$

is satisfied for any column vectors  $\mathbf{p} \in \mathbb{R}^m$  and  $\mathbf{q} \in \mathbb{R}^n$  if any of the following conditions are matched.

$$1. \quad \sigma_1(\mathbf{Y}) \leq \frac{1-p}{p} \|\mathbf{UV}^\top\|_* - \sigma_1(\mathbf{UV}^\top) = \frac{1-p}{p} \sum_{i=1}^{\min(m,n)} \sigma_i(\mathbf{UV}^\top) - \sigma_1(\mathbf{UV}^\top) \quad (152)$$

$$2. \quad (117) \text{ and } (98) \text{ hold for } \mathbf{U}, \mathbf{V}, \text{ each having } d \text{ columns, and} \\ \|\mathbf{Y}\|_F^2 \leq \|\mathbf{UV}^\top\|_F^2 - \frac{1-p}{p} \|\mathbf{UV}^\top\|_* (2\|\mathbf{UV}^\top\|_* - 1) \quad (153)$$

$$3. \quad \|\mathbf{Y} - \mathbf{UV}^\top\|_{\max} \leq \frac{1}{\sqrt{mn}} \frac{1-p}{p} \|\mathbf{UV}^\top\|_* \quad (154)$$

*Proof.* As the main tool to prove (152), (153) and (154), we notice that, thanks to Cauchy-Schwartz inequality, we get

$$\mathbf{p}^\top (\mathbf{Y} - \mathbf{UV}^\top) \mathbf{q} \leq \|\mathbf{p}\|_2 \|(\mathbf{Y} - \mathbf{UV}^\top) \mathbf{q}\|_2 \quad (155)$$

for any column vector  $\mathbf{p} \in \mathbb{R}^m$  and  $\mathbf{q} \in \mathbb{R}^n$ .

1. We will obtain (118) if we are able to show that (152) implies

$$\|(\mathbf{Y} - \mathbf{UV}^\top) \mathbf{q}\|_2 \leq \frac{1-p}{p} \|\mathbf{q}\|_2 \|\mathbf{UV}^\top\|_*. \quad (156)$$

By means of (143), we get

$$\|(\mathbf{Y} - \mathbf{UV}^\top) \mathbf{q}\|_2 \leq \|\mathbf{Y} - \mathbf{UV}^\top\|_2 \|\mathbf{q}\|_2 = \sigma_1(\mathbf{Y} - \mathbf{UV}^\top) \|\mathbf{q}\|_2. \quad (157)$$

Since, for any pairs of matrices  $\mathbf{A}, \mathbf{B} \in \mathbb{R}^{m \times n}$  one gets

$$\sigma_1(\mathbf{A} + \mathbf{B}) \leq \sigma_1(\mathbf{A}) + \sigma_1(\mathbf{B}), \quad (158)$$

then

$$\|(\mathbf{Y} - \mathbf{UV}^\top) \mathbf{q}\|_2 \leq (\sigma_1(\mathbf{Y}) + \sigma_1(\mathbf{UV}^\top)) \|\mathbf{q}\|_2, \quad (159)$$

since the singular values of  $-\mathbf{UV}^\top$  are the same ones of  $\mathbf{UV}^\top$ . It's easy to see that (159) combined with the assumption (152) gives (156).

2. We will obtain (118) if we are able to show that (153) implies

$$\|(\mathbf{Y} - \mathbf{UV}^\top) \mathbf{q}\|_2 \leq \frac{1-p}{p} \|\mathbf{q}\|_2 \|\mathbf{UV}^\top\|_* \quad (160)$$

Since, by using (144), we get

$$\|(\mathbf{Y} - \mathbf{UV}^\top) \mathbf{q}\|_2 \leq \|\mathbf{Y} - \mathbf{UV}^\top\|_F \|\mathbf{q}\|_2. \quad (161)$$

Now,

$$\|\mathbf{Y} - \mathbf{UV}^\top\|_F^2 = \|\mathbf{Y}\|_F^2 + \|\mathbf{UV}^\top\|_F^2 - 2\langle \mathbf{Y}, \mathbf{UV}^\top \rangle \quad (162)$$

$$= \|\mathbf{Y}\|_F^2 + \|\mathbf{UV}^\top\|_F^2 - 2\langle \mathbf{Y} - \mathbf{UV}^\top + \mathbf{UV}^\top, \mathbf{UV}^\top \rangle \quad (163)$$

$$= \|\mathbf{Y}\|_F^2 - \|\mathbf{UV}^\top\|_F^2 - 2\langle \mathbf{Y} - \mathbf{UV}^\top, \mathbf{UV}^\top \rangle \quad (164)$$

and, by combining (98) with (117), we get

$$\|\mathbf{Y} - \mathbf{UV}^\top\|_F^2 = \|\mathbf{Y}\|_F^2 - \|\mathbf{UV}^\top\|_F^2 - 2\frac{1-p}{p} \|\mathbf{UV}^\top\|_*^2. \quad (165)$$

Therefore,  $\|\mathbf{Y} - \mathbf{UV}^\top\|_F^2 \leq \frac{1-p}{p} \|\mathbf{UV}^\top\|_*$  rewrites

$$\|\mathbf{Y}\|_F^2 - \|\mathbf{UV}^\top\|_F^2 - 2\frac{1-p}{p} \|\mathbf{UV}^\top\|_*^2 - \frac{1-p}{p} \|\mathbf{UV}^\top\|_* \leq 0 \quad (166)$$

and therefore we get the thesis.

3. We will obtain (118) if we are able to show that (154) implies

$$\|(\mathbf{Y} - \mathbf{UV}^T)\mathbf{q}\|_2 \leq \frac{1-p}{p} \|\mathbf{q}\|_2 \|\mathbf{UV}^T\|_{\star}. \quad (167)$$

But, this is straightforward as consequence of (145) which states

$$\|(\mathbf{Y} - \mathbf{UV}^T)\mathbf{q}\|_2 \leq \sqrt{mn} \|\mathbf{Y} - \mathbf{UV}^T\|_{\max} \|\mathbf{q}\|_2. \quad (168)$$

□

## 6 Closed-form solution for the convex lower bound of dropout for MF

**Proposition 12.** Let  $\mathbf{X} = \mathbf{L}\Sigma\mathbf{R}^\top$  be the singular value decomposition of  $\mathbf{X}$ . The optimal solution to

$$\min_{\mathbf{Y}} \|\mathbf{X} - \mathbf{Y}\|_F^2 + \lambda \|\mathbf{Y}\|_*^2 \quad (169)$$

is given by  $\mathbf{Y} = \mathbf{L}\mathcal{S}_\mu(\Sigma)\mathbf{R}^\top$ , where  $\lambda > 0$ ,  $\mu = \frac{\lambda d}{1+\lambda d}\bar{\sigma}_d(\mathbf{X})$ ,  $\bar{\sigma}_d(\mathbf{X})$  is the average of the top  $d$  singular values of  $\mathbf{X}$ ,  $d$  represents the largest integer such that  $\sigma_d(\mathbf{X}) > \frac{\lambda d}{1+\lambda d}\bar{\sigma}_d(\mathbf{X})$ , and  $\mathcal{S}_\mu$  is defined as the shrinkage thresholding operator which set to zero all singular values of  $\mathbf{X}$  which are less or equal to  $\mu$ .

*Proof.* Since both the nuclear norm  $\|\cdot\|_*$  and the Frobenius norm  $\|\cdot\|_F$  are rotationally invariant, up to non-restrictive rotations applied to the data matrix  $\mathbf{X}$ , the thesis can be equivalently proved by considering the following result.

Let  $\mathbf{x} = [x_1, \dots, x_r]$  a fixed vector with  $x_i \geq x_{i+1} > 0$ . Define  $\mu_d$  as the average of the first  $d$  entries of  $\mathbf{x}$ . Then, the optimal solution to the optimization problem

$$\min_{\mathbf{a} \in \mathbb{R}^r} \|\mathbf{a} - \mathbf{x}\|_2^2 + \lambda \|\mathbf{a}\|_1^2 \quad (170)$$

is given by  $\mathbf{a} = [a_1, \dots, a_r]$  where

$$a_i = \begin{cases} x_i - \frac{\lambda d}{1+\lambda d}\mu_d & i = 1, \dots, d \\ 0 & i = d+1, \dots, r \end{cases} \quad (171)$$

where  $d$  is the largest positive integer less or equal to  $r$  such that all  $a_i$  given in (171) are positive.

In order to prove this claim, first note that the objective function is strictly convex and, hence, there is a unique global minimum. If  $\lambda = 0$  the global minimizer is precisely  $\mathbf{x}$ , which is consistent with the formula given in the statement of the proposition. So, suppose that  $\lambda > 0$ . Next, notice that if  $\mathbf{a} = [a_1, a_2, \dots, a_r]$  is an optimal solution, then all  $a_i$  must be non-negative. Indeed, if say  $a_1 < 0$ , then the vector  $[-a_1, a_2, \dots, a_r]$  already gives a smaller objective value. Now, the first order optimality condition of our problem rewrites

$$\mathbf{0} \in (\mathbf{a} - \mathbf{x}) + \lambda \|\mathbf{a}\|_1 \partial \|\mathbf{a}\|_1. \quad (172)$$

There are two cases for each coordinate  $i$  of (172).

$$a_i = x_i - \lambda \|\mathbf{a}\|_1, \text{ if } a_i > 0, \text{ and } x_i = \lambda \|\mathbf{a}\|_1 \xi_i, \text{ if } a_i = 0. \quad (173)$$

where  $\xi_i$  in (173) is some number in the interval  $[0, 1]$ . Notice that since  $x_i > 0$  for every  $i$ , the second condition in (173) guarantees that the global solution can not be the zero vector, otherwise  $\|\mathbf{a}\|_1 = 0$  and so  $x_i = 0$  for every  $i$ . Thus, suppose that exactly the first  $k \geq 1$  coordinates of  $\mathbf{a}$  are non-zero. Then sum the equations  $a_i = x_i - \lambda k \|\mathbf{a}\|_1$  for  $i = 1, \dots, k$ . We get

$$\|\mathbf{a}\|_1 = k\mu_k - \lambda k \|\mathbf{a}\|_1 \quad (174)$$

which gives

$$\|\mathbf{a}\|_1 = \frac{k}{1+\lambda k} \mu_k. \quad (175)$$

Then (173) and (175) give

$$a_i = x_i - \frac{\lambda k}{1+\lambda k} \mu_k > 0 \text{ for } i = 1, \dots, k \text{ and } a_i = 0 \text{ for } i = k+1, \dots, r. \quad (176)$$

Now, let  $d$  be the largest integer such that  $a_i = x_i - \frac{\lambda d}{1+\lambda d} \mu_d > 0$  and define the vector

$$\mathbf{v} = \left[ x_1 - \frac{\lambda d}{1+\lambda d} \mu_d, \dots, x_d - \frac{\lambda d}{1+\lambda d} \mu_d, \underbrace{0, \dots, 0}_{r-d \text{ times}} \right]. \quad (177)$$

If  $d = r$ , then  $\mathbf{v}$  satisfies the optimality condition (173) and so it is the global minimizer. So suppose that  $d < r$ . In that case, to show that  $\mathbf{v}$  is the global minimizer it suffices to show that

$$x_{d+1} - \frac{\lambda d}{1 + \lambda d} \mu_d \leq 0. \quad (178)$$

since this is equivalent to saying that for any  $i > d$  there exists  $\xi_i \in [0, 1]$  such that  $x_i = \lambda \|\mathbf{v}\|_1 \xi_i$  in which case  $\mathbf{v}$  satisfies the optimality condition (173). Now by the maximality of  $d$ , we have that

$$x_{d+1} - \frac{\lambda(d+1)}{1 + \lambda(d+1)} \mu_{d+1} \leq 0. \quad (179)$$

Equivalently, we get the following chain of inequalities

$$\left(1 - \frac{\lambda}{1 + \lambda(d+1)}\right) x_{d+1} - \frac{\lambda}{1 + \lambda(d+1)} \sum_{k=1}^d x_k \leq 0 \quad (180)$$

$$\frac{1 + \lambda d}{1 + \lambda(d+1)} x_{d+1} - \frac{\lambda}{1 + \lambda(d+1)} \sum_{k=1}^d x_k \leq 0 \quad (181)$$

$$x_{d+1} - \frac{\lambda d}{1 + \lambda d} \mu_d \leq 0 \quad (182)$$

from which we obtain the desired condition. □



## 7 Complementary results for the numerical simulation

In this Section we will present the complete version of Figure 1 in the paper. Also, we provide more examples of digits' reconstruction on MNIST dataset.

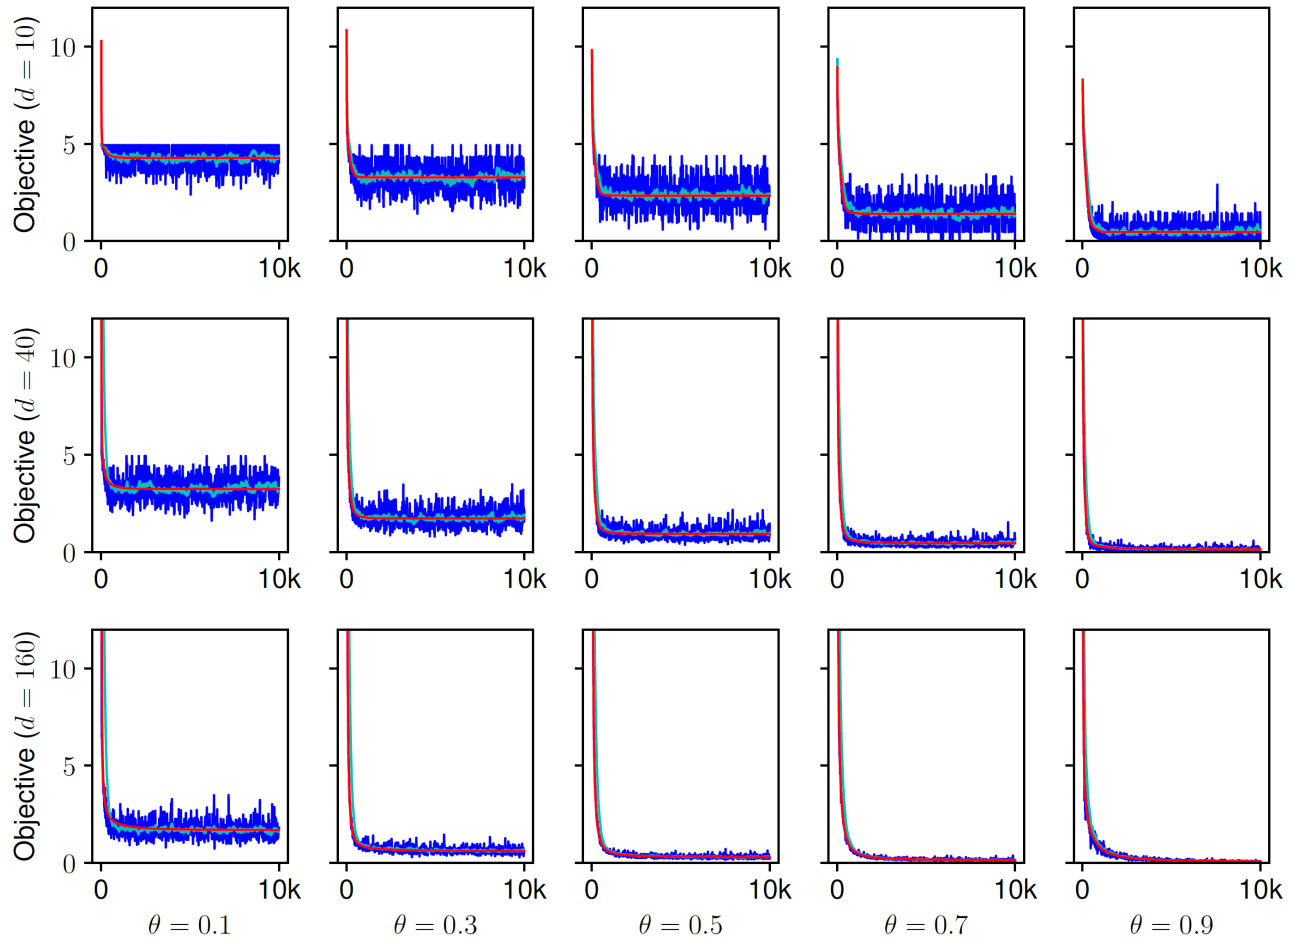

Figure 1: For  $\theta \in \{0.1, 0.3, 0.5, 0.7, 0.9\}$  and  $d \in \{10, 40, 160\}$  we compare the deterministic problem (red) with its stochastic counterpart (blue). The exponential moving average of the stochastic objective is shown in cyan. Best viewed in color.

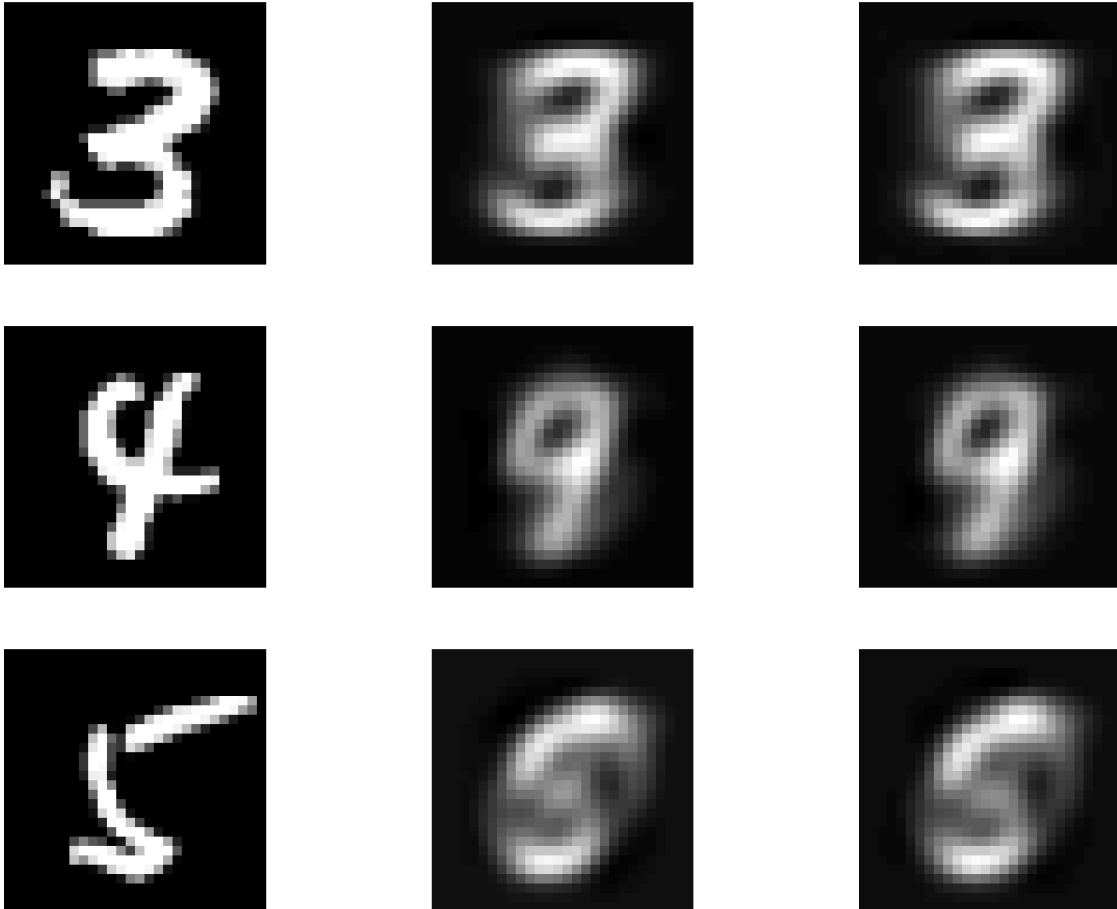

Figure 2: Experiments on MNIST dataset, whose original images are reported in the first column. For each of those, we compute dropout for MF with  $\theta = 0.5$  (second column) and the corresponding closed-form solution (third column).

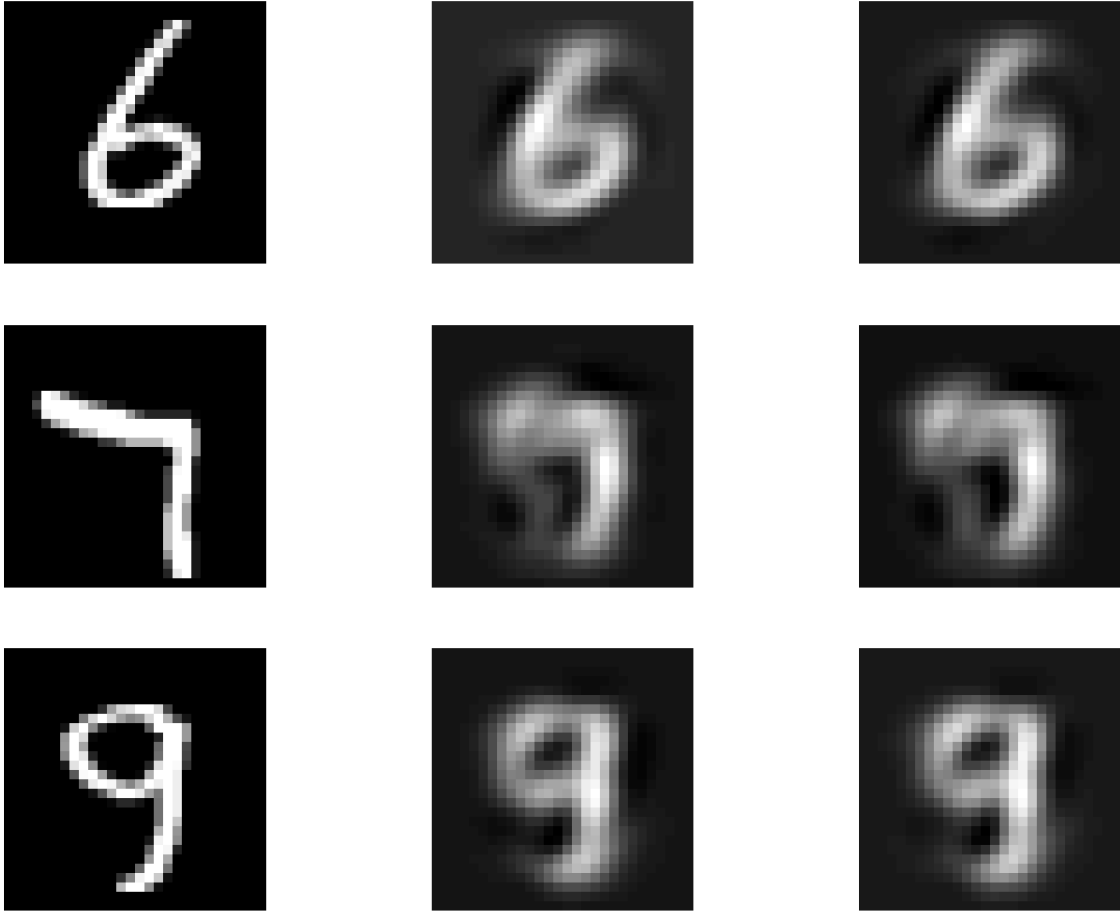

Figure 3: Experiments on MNIST dataset, whose original images are reported in the first column. For each of those, we compute dropout for MF with  $\theta = 0.5$  (second column) and the corresponding closed-form solution (third column).

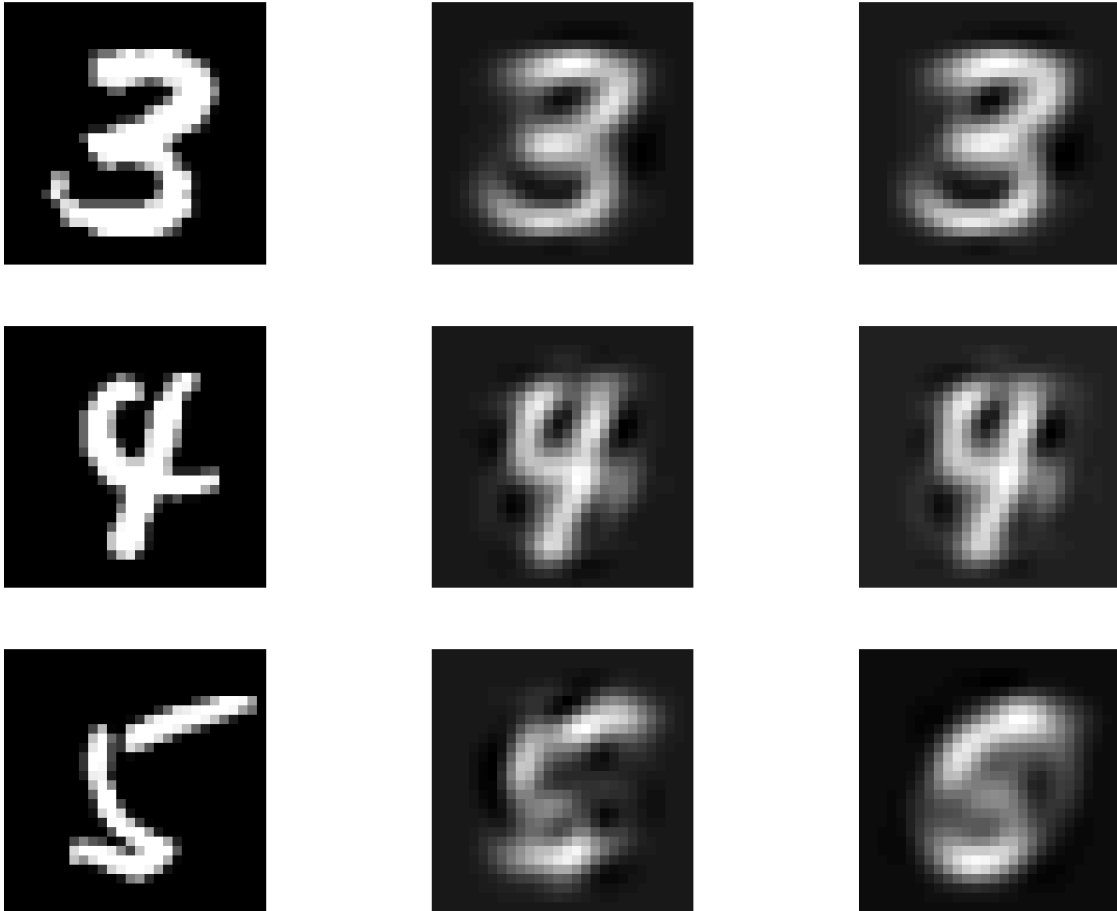

Figure 4: Experiments on MNIST dataset, whose original images are reported in the first column. For each of those, we compute dropout for MF with  $\theta = 0.8$  (second column) and the corresponding closed-form solution (third column).

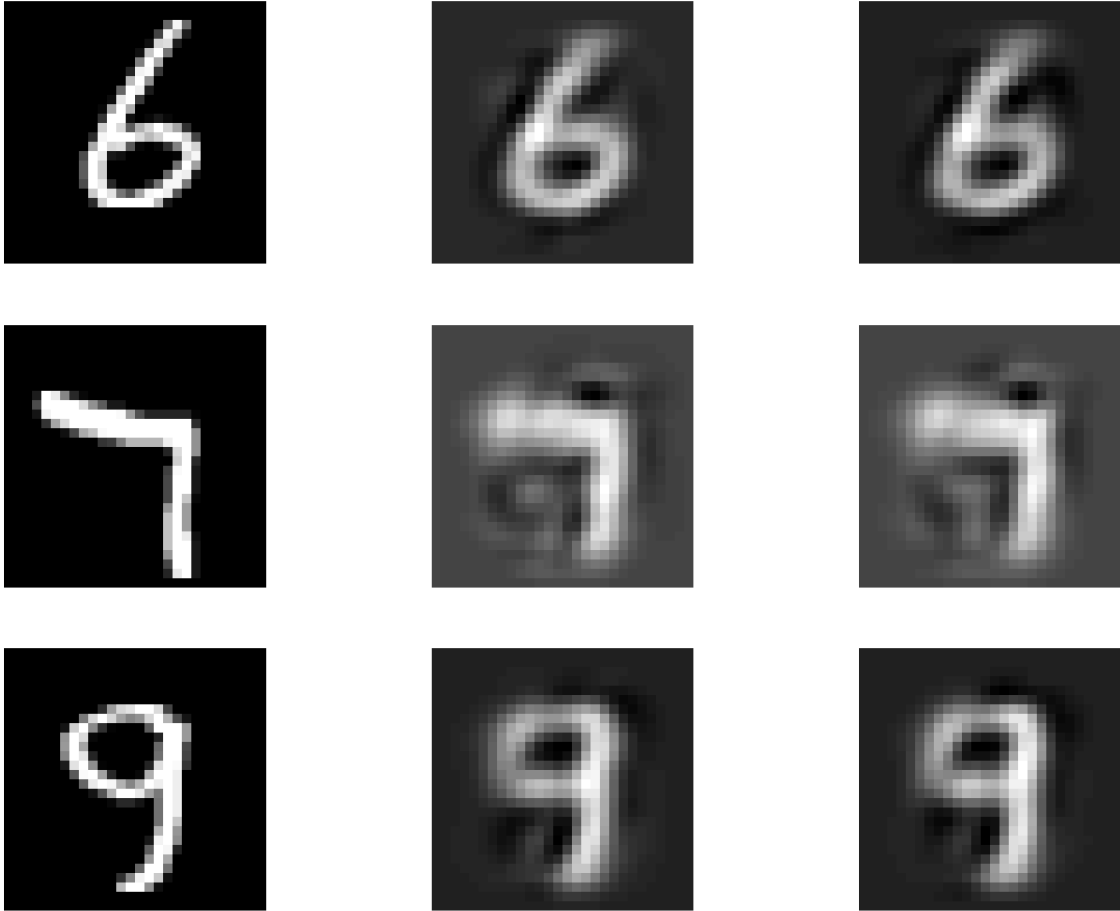

Figure 5: Experiments on MNIST dataset, whose original images are reported in the first column. For each of those, we compute dropout for MF with  $\theta = 0.8$  (second column) and the corresponding closed-form solution (third column).
